1

2 **Oocyte Aging is Controlled by Mitogen Activated Protein Kinase Signaling**

3 Hanna Achache<sup>1\*</sup>, Roni Falk<sup>1\*</sup>, Noam Lerner<sup>2,3</sup>, Tsevi Beatus<sup>2,3</sup>, and Yonatan B.

4 Tzur<sup>1,4</sup>

5

6

7 <sup>1</sup> Department of Genetics, Institute of Life Sciences, The Hebrew University of

8 Jerusalem, Jerusalem 91904, Israel

9 <sup>2</sup> Department of Neurobiology, The Institute of Life Science, The Hebrew University

10 of Jerusalem, Jerusalem 91904, Israel

11 <sup>3</sup> The Alexander Grass Center for Bioengineering, The Rachel and Selim Benin

12 School of Computer Science and Engineering, The Hebrew University of Jerusalem,

13 Jerusalem 91904, Israel

14

15

16

17

18 \*These authors contributed equally to this work

19

20 <sup>4</sup>Contact: [tzur@mail.huji.ac.il](mailto:tzur@mail.huji.ac.il); Phone: +972-2-658-5442; Fax: +972-2-658-6975

21 Running title: Oocyte aging is controlled by MAPK

22 **Abstract**

23 Oogenesis is one of the first processes to fail during aging. In women, most oocytes  
24 cannot successfully complete meiotic divisions during the fourth decade of life. Studies  
25 of the nematode *Caenorhabditis elegans* have uncovered conserved genetic  
26 pathways that control lifespan, but our knowledge regarding reproductive aging in  
27 worms and humans is limited. Specifically, little is known about germline internal  
28 signals that dictate the oogonal biological clock. Here, we report a thorough  
29 characterization of the changes in the worm germline during aging. We found that  
30 shortly after ovulation halts, germline proliferation declines, while apoptosis continues,  
31 leading to a gradual reduction in germ-cell numbers. In late aging stages, we observed  
32 that meiotic progression is disturbed and crossover designation and DNA double-  
33 strand break repair decrease. In addition, we detected a decline in the quality of mature  
34 oocytes during aging, as reflected by decreasing size and elongation of interhomolog  
35 distance, a phenotype also observed in human oocytes. Many of these altered  
36 processes were previously attributed to MAPK signaling variations in young worms. In  
37 support of this, we observed changes in activation dynamics of MPK-1 during aging.  
38 We therefore tested the hypothesis that MAPK controls oocyte quality in aged worms  
39 using both genetic and pharmacological tools. We found that in mutants with high  
40 levels of activated MPK-1, oocyte quality deteriorates more rapidly than in wild-type  
41 worms, whereas reduction of MPK-1 levels enhances quality. Thus, our data indicate  
42 that MAPK signaling controls germline aging and could be used to attenuate the rate  
43 of oogenesis quality decline.

44

## 45 **Introduction**

46 Aging leads to a gradual decline and failure of physiological processes. One of the  
47 first processes to fail during metazoan aging is oogenesis (Andux & Ellis 2008; Luo *et*  
48 *al.* 2010; Nagaoka *et al.* 2012; Webster & Schuh 2017; Greenblatt *et al.* 2019; Gruhn  
49 *et al.* 2019). In women, oocytes enter meiosis during maternal embryogenesis, arrest  
50 at the end of meiotic prophase I, and remain quiescent for decades. Over time, the  
51 quality and quantity of these oocytes decreases, concurrently with reduced fertility and  
52 increased occurrence of aneuploidy (te Velde & Pearson 2002; Bentov *et al.* 2011;  
53 Eichenlaub-Ritter *et al.* 2011; Duncan *et al.* 2012; Lord & Aitken 2013). Knowledge of  
54 the genetic and molecular mechanisms that govern this aging process is currently  
55 limited.

56 Studies in the nematode *Caenorhabditis elegans* have played pivotal roles in our  
57 understanding of the genetic contribution to longevity and aging. The *C. elegans*  
58 system has the advantages of short lifespan (2–3 weeks), simple genetic setup, and  
59 the evolutionary conservation of the longevity pathways (Kenyon 2010; Luo *et al.*  
60 2010; Wilkinson *et al.* 2012). Several inherent properties make *C. elegans* highly  
61 suitable for the study of germline aging (Hughes *et al.* 2007; Andux & Ellis 2008; Luo  
62 *et al.* 2009). First, oogenesis is continuous and the nuclei in the adult gonad are  
63 ordered in a spatio-temporal manner from the germ line stem cells to the mature  
64 oocyte (Crittenden *et al.* 1994; Lui & Colaiacovo 2013; Pazdernik & Schedl 2013;  
65 Hillers *et al.* 2017). Second, in hermaphrodites, ovulation is continuous as long as self-  
66 sperm is available. Once sperm is depleted, oocytes arrest at the end of meiotic  
67 prophase I. The hermaphrodite worm remains fertile for several more days and can  
68 resume ovulation and fertilization upon mating with males as a response to the  
69 introduction of allosperm into the uterus (Hodgkin 1983; Hughes *et al.* 2007; Andux &

70 Ellis 2008; Mendenhall *et al.* 2011; Chasnov 2013; Pickett *et al.* 2013; Kocsisova *et*  
71 *al.* 2019). Thus, unlike human oocytes, worm oocytes are continuously produced  
72 because the germ-cell population is proliferative (Crittenden *et al.* 2006; Crittenden &  
73 Kimble 2008). Finally, both human and *C. elegans* females reproduce for about one-  
74 third of their lifespan (Hughes *et al.* 2007) and thus undergo reproductive aging on  
75 proportional time scales.

76 Building upon these properties, several previous works described different aspects  
77 of oogenesis at some phases of germline aging in *C. elegans* (Hughes *et al.* 2007;  
78 Andux & Ellis 2008; Luo *et al.* 2009; Luo *et al.* 2010; Ye & Bhalla 2011; Wang *et al.*  
79 2014; Bohnert & Kenyon 2017; Templeman & Murphy 2018). These works showed  
80 that aging oocytes undergo gross morphological and functional changes.  
81 Morphological changes include the presence of small stacked oocytes and endomitotic  
82 nuclei in the proximal gonad (de la Guardia *et al.* 2016; Kocsisova *et al.* 2019).  
83 Functional defects that occur during aging involve reduced embryo hatching and  
84 stress resistance, decreased oocyte fertilizability, altered crossover distribution, and  
85 high incidence of males (Lim *et al.* 2008; Luo *et al.* 2010; Perez *et al.* 2017). In addition,  
86 mutations in several genetic pathways extend the fertility term (Luo *et al.* 2010;  
87 Hughes *et al.* 2011). Among these, mutations in genes encoding factors involved in  
88 the insulin/IGF-1 signaling (IIS), the TGF- $\beta$ -Sma/Mab, and the dietary restriction  
89 pathways extend the fertility period in worms from both self and allosperm (Reviewed  
90 in (Lopez-Otin *et al.* 2013)). Nevertheless, to date no systematic work has analyzed  
91 the dynamics of major meiotic processes along all steps of germline aging. Moreover,  
92 the germline signals that lead to the specific oogonial changes during normal aging  
93 are still largely unknown.

94 Signals that control developmental processes are often also involved in aging  
95 (Blagosklonny & Hall 2009; Gruber *et al.* 2016; Slack 2017). We therefore  
96 hypothesized that some signaling pathways that are activated during oogenesis also  
97 influence germline and oocyte aging. The MAPK pathway controls oogenesis  
98 progression in *C. elegans* (Lee *et al.* 2007; Kim *et al.* 2013; Nadarajan *et al.* 2016).  
99 Several proteins that promote or restrict the activation of its terminal kinase, MPK-1,  
100 the worm homolog of ERK, and this, in turn, leads to multiple transcriptional and post-  
101 transcriptional cellular changes that drive oogonial processes (Church *et al.* 1995;  
102 Lackner & Kim 1998; Kritikou *et al.* 2006; Leacock & Reinke 2006; Lee *et al.* 2007;  
103 Arur *et al.* 2011; Yin *et al.* 2016; Achache *et al.* 2019).

104 We found that meiotic progression is altered and processes such as double-strand  
105 break repair and crossover designation are reduced in the *C. elegans* germline during  
106 aging. These alterations occur concomitantly with a change in spatial activation of  
107 MPK-1. During aging, oocyte quality was inversely correlated with and dependent on  
108 the level of MAPK activation. Furthermore, in mutants with high levels of activated  
109 MPK-1, oocyte quality deteriorated more rapidly than in wild-type worms, whereas  
110 reduction of MPK-1 levels enhanced quality. We conclude that MAPK signaling in  
111 mature oocytes controls reproductive aging by influencing oocyte and germline quality.

112

## 113 **Results**

### 114 **Germline aging leads to a reduction in germ cell numbers and altered meiotic** 115 **staging**

116 *C. elegans* hermaphrodite worms transiently produce sperm during the L3 larval  
117 stage and switch to oogenesis in the fourth larval stage (L4) (reviewed in (Schedl

118 1997)). Oocytes start to be fertilized at the adult stage, and hermaphrodites continue  
119 to ovulate until most of the self-sperm is depleted, at which point the oocytes arrest  
120 and age (Kim *et al.* 2013; Templeman & Murphy 2018). To study germline aging, we  
121 chose to use the N2 wild-type strain instead of feminized mutants as was done  
122 previously (e.g., (Hughes *et al.* 2007; Andux & Ellis 2008; Lim *et al.* 2008; Luo *et al.*  
123 2010; de la Guardia *et al.* 2016; Bohnert & Kenyon 2017; Templeman & Murphy  
124 2018)). Our strategy ensured that the aging effects we detected were unrelated to any  
125 mutation. We defined four points during the aging process: the onset of reproduction,  
126 the beginning of the arrest, the end of the reproductive term by male cross-fertilization,  
127 and after the reproductive term (Hughes *et al.* 2007), which can also be described as  
128 young, mature, old, and menopausal, respectively. Previous work has shown that most  
129 self-progeny of wild-type worms are laid at the second day post L4 and that almost all  
130 the embryos are laid within three days (Hughes *et al.* 2007; Pickett *et al.* 2013; Wang  
131 *et al.* 2014). We verified that this occurred under our experimental conditions (Fig. S1).  
132 A negligible number of oocytes were laid after three days post L4 (under 0.8 on  
133 average per worm), and no viable embryo was laid after the fifth day (Fig. S1). Thus,  
134 we chose to compare worms on the first (young), fourth (mature), eighth (old), and  
135 tenth (menopausal) days after L4 stage.

136 To find how aging affects germ cell number and developmental stages, we  
137 examined dissected gonads stained with DAPI. The *C. elegans* gonad is comprised of  
138 two U-shaped arms with nuclei arranged in spatial-developmental order. The  
139 proliferative zone is located at the distal end of each arm, and mature oocytes and the  
140 spermatheca are found at the proximal end. Nuclei in the proliferative zone undergo  
141 mitotic cell cycles to maintain a population of progenitors that enter meiosis in the  
142 leptotene/zygotene (LZ, transition) zone. From there, nuclei progress through

143 pachytene, where recombination intermediates mature into crossovers within paired  
144 and synapsed homologs. Pachytene nuclei move into diplotene, and finally oocytes  
145 mature and cellularize in diakinesis, where six discrete bivalents can be visualized  
146 (Fig. 1A). We counted the total number of nuclei in DAPI-stained gonads and observed  
147 an overall decrease with age (Fig. 1B). The reduction in germ cell numbers could be  
148 due to either a relative reduction in numbers at all meiotic stages or to numbers at  
149 specific stages. To determine which is the case in the aging gonad, we quantified the  
150 numbers of nuclei at different meiotic stages. The number of LZ nuclei quickly dropped  
151 and were reduced at the onset of oocytes arrest (day 1:  $108 \pm 17$ ; day 4:  $13 \pm 9$ ; Fig. 1B).  
152 We also detected a reduction in the number of pachytene nuclei during aging (Fig.  
153 1B). Thus, germline aging and arrest lead to reductions in germ cell numbers, mostly  
154 due to a rapid drop in the number of LZ and pachytene nuclei.

155 The spatial temporal order in the young adult gonad has been highly advantageous  
156 in meiotic studies in this model organism. This order was always present in day 1 and  
157 day 4 worms. However, starting at day 8 after the L4 stage, we noticed an increased  
158 number of gonads with altered morphology. About 17% of the gonads were very small  
159 (with fewer than 500 germ cell nuclei) on day 8, and about 19% were very small on  
160 day 10. In addition, there was an increase in gonads with greater than 1000 germ cells  
161 (3.5% at day 8 and 18.5% at day 10). In these gonads, the meiotic order was disrupted,  
162 and diakinetik-like nuclei with large cytosolic volumes, were observed along the middle  
163 of the gonad, and pachytene-like nuclei were observed proximally (Fig. 1A). The  
164 mixture of stages indicates that during aging, there is loss of meiotic progression  
165 control. A similar phenotype was reported previously in mutants of *kin-18* (Yin *et al.*  
166 2016), an activator of MAPK. Taken together these analyses suggest that germline

167 aging leads first to a reduction in the number of germ cells and then to misregulation  
 168 of meiotic progression.

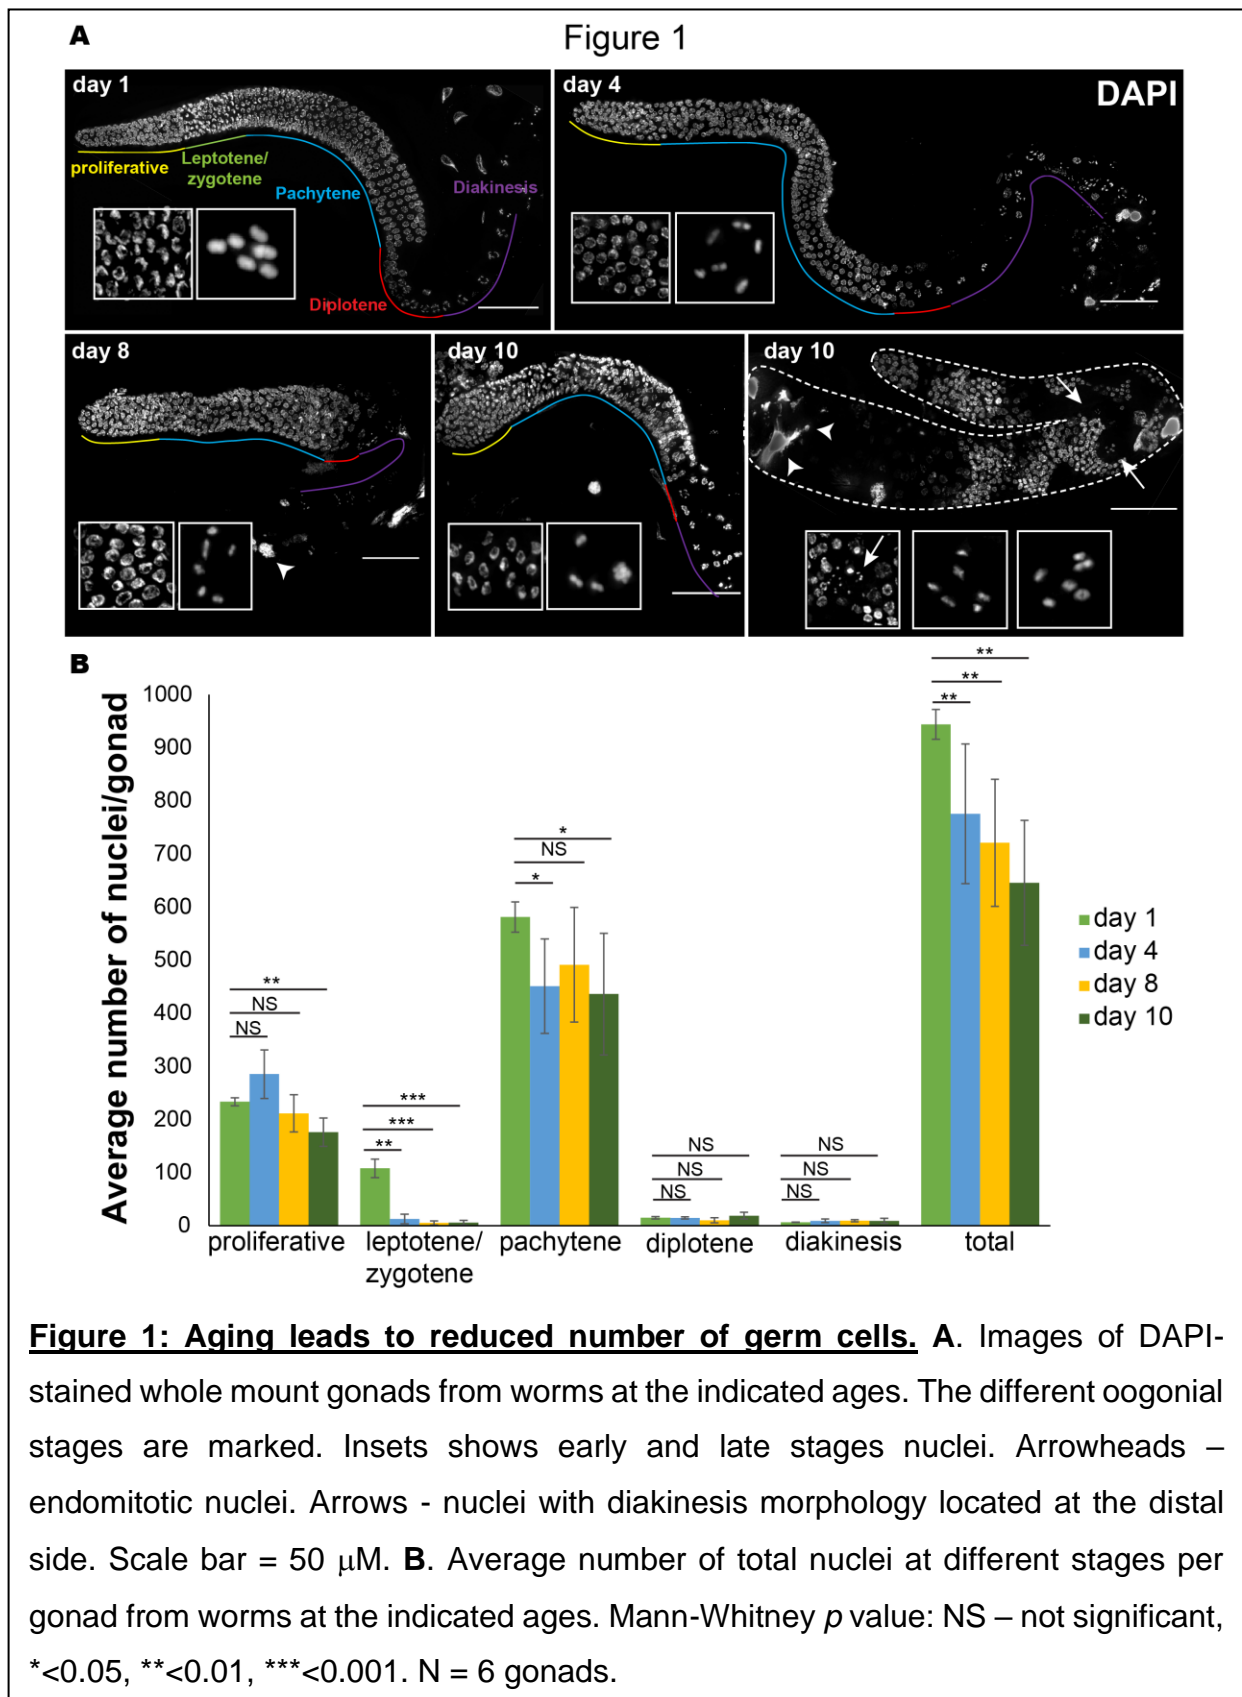



## 169 **Germ cell proliferation declines with aging**

170 The number of nuclei in the gonad is tightly regulated by a dynamic balance  
171 between germ cell proliferation and removal by both oocyte ovulation and apoptotic  
172 cell death (Lettre & Hengartner 2006). When sperm are depleted, ovulation ceases  
173 almost completely. The reduction in the number of germline nuclei may therefore be  
174 due to either an increase in apoptosis or a decrease in mitotically proliferating nuclei.  
175 To test the former, we used a strain stably expressing CED-1::GFP, a fusion protein  
176 that is expressed in somatic sheath cells, which cluster around each apoptotic corpse  
177 during engulfment (Zhou *et al.* 2001; Schumacher *et al.* 2005). This approach is  
178 particularly useful for detecting early apoptotic stages. In agreement with a previous  
179 publication (de la Guardia *et al.* 2016), in young adult worms we found fewer apoptotic  
180 nuclei ( $4.6 \pm 2.1$ ) than in mature worms ( $8.2 \pm 3.6$ ), but the trend was reversed in old  
181 worms ( $4.1 \pm 2.4$ ,  $n=7$ , Fig. 2A). We were unable to quantify apoptotic levels at day 10,  
182 since almost all the transgenic CED-1::GFP worms died before reaching day 10.  
183 These results suggest that at the onset of aging, the apoptotic removal of meiocytes  
184 increases but then returns to young worm levels.

185 The increase in apoptosis was transient, whereas the reduction in germ cell  
186 numbers was continuous. To investigate if proliferation also regulates the overall  
187 number of nuclei in the gonad, we monitored the number of germ cells in M phase at  
188 days 1, 4, 8 and 10 by staining for a mitosis-specific marker phospho-histone H3 (pH3)  
189 (Hans & Dimitrov 2001). We detected a rapid decline in the number of pH3-positive  
190 nuclei in the distal region at day 4, and at days 8 and 10 no nuclei were stained with  
191 pH3 (Fig. 2B, C). Taken together these results suggest that aging leads to reduction  
192 in the number of germ cells due to both reduced proliferation and increased apoptosis.

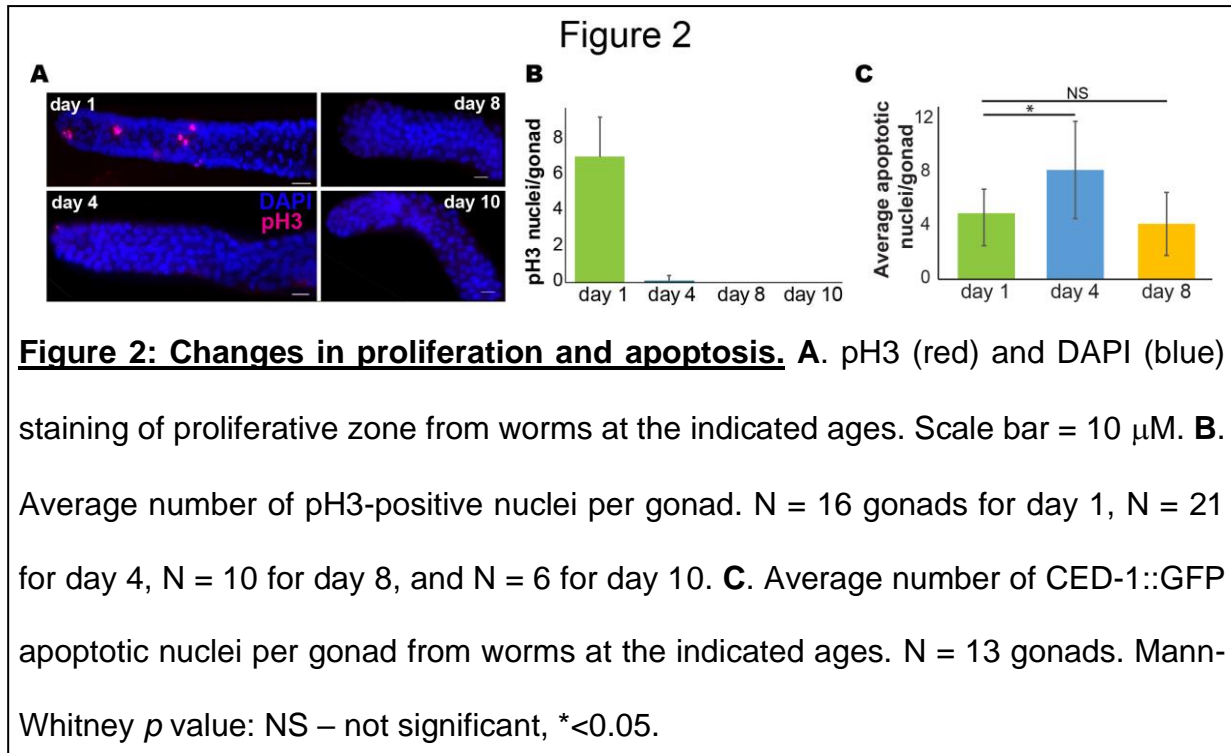

193

#### 194 **Reduced levels of RAD-51 foci in aging gonads**

195 Apoptosis in the worm germline has been correlated with aberrations in DNA  
196 double-strand break repair and synapsis (reviewed in (Gartner *et al.* 2008)). To test if  
197 the increase in apoptosis is induced by altered dynamics of homologous  
198 recombination repair, we quantified the number of repair loci using RAD-51 staining.  
199 RAD-51 is a strand exchange protein that has been used extensively to study the DNA  
200 double-strand break repair dynamics in the *C. elegans* gonad (Colaiacovo *et al.* 1999;  
201 Rinaldo *et al.* 2002; Alpi *et al.* 2003; Bhalla & Dernburg 2005; Hayashi *et al.* 2007;  
202 Mets & Meyer 2009; Yu *et al.* 2016). In the young adult worms, the levels of RAD-51  
203 rose following entry into meiotic prophase I and peaked in the early to mid-pachytene  
204 stage (Fig. 3A, B), as previously reported (Colaiacovo *et al.* 2003; Achache *et al.*  
205 2019). Numbers of RAD-51 foci were greatly reduced in nuclei at all the stages of  
206 meiotic prophase I in aged worms (Fig. 3A, B). Indeed, at day 1, we found an average

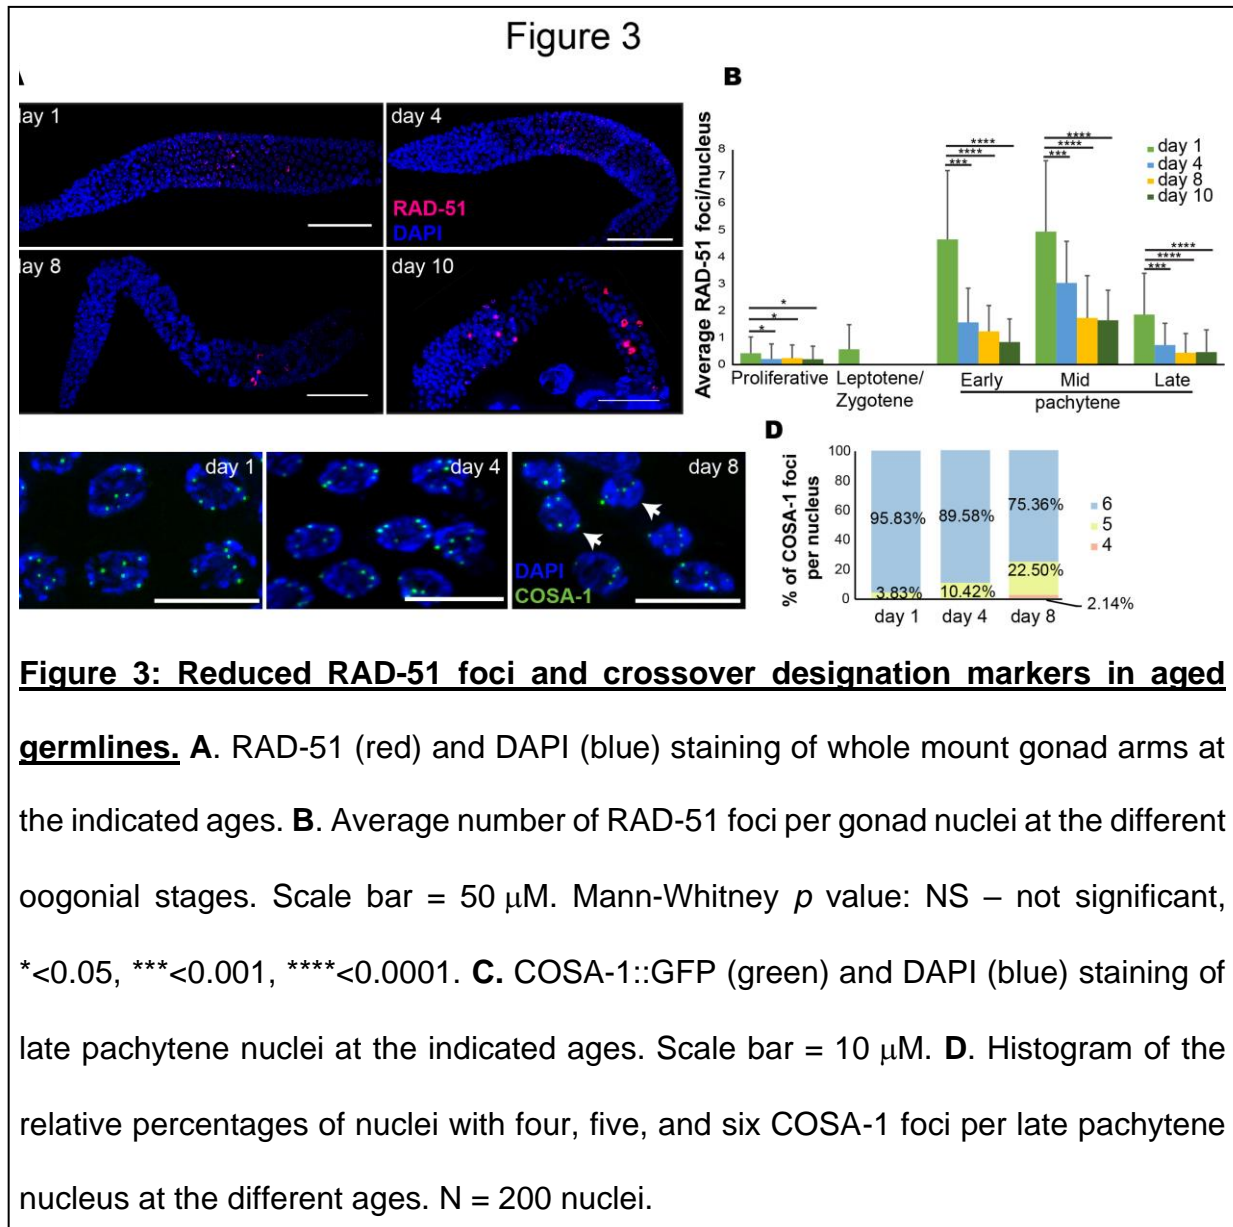

207 of  $4.7 \pm 2.6$  foci per nucleus in early pachytene, compared to  $1.6 \pm 1.3$ ,  $1.3 \pm 1$ , and  
 208  $0.9 \pm 0.9$  at days 4, 8, and 10, respectively. Thus, after the halt in ovulation, the number  
 209 of RAD-51 foci drops. This drop in the number of RAD-51 foci might be explained by  
 210 a progression of the arrested nuclei beyond the removal of RAD-51, together with a  
 211 reduction in further induction of double-strand breaks. Another option could be a defect  
 212 in either the induction or the repair of the DNA double-strand breaks. Interestingly, in  
 213 gonads of day 8 and 10 nuclei, we detected RAD-51 staining that filled the entire  
 214 nucleoplasm (Fig. 2A). This type of staining could be the result of fragmented DNA or

215 misregulation of RAD-51 expression. Taken together our results suggest that the  
216 increase in apoptosis observed on day 4 is unlikely to be the result of perturbations in  
217 the DNA repair mechanism.

218

### 219 **Synaptonemal complex formation is unchanged during germline aging**

220 During meiosis, the formation of a proteinaceous structure known as the  
221 synaptonemal complex (SC) stabilizes pairing interactions and promotes the  
222 completion of crossover recombination. SCs assemble along the lengths of the paired  
223 chromosomes to keep them closely associated and aligned (Colaiacovo *et al.* 2003;  
224 Couteau & Zetka 2005; Hayashi *et al.* 2010; Schild-Prufert *et al.* 2011). This zipper-  
225 like structure is composed of lateral element proteins that are recruited to the  
226 chromosome axes and to central region proteins that localize between them and keep  
227 the homologs aligned (reviewed in (Zetka 2009)). Failure to properly form the SC  
228 increases apoptosis levels in the gonad (Bohr *et al.* 2016). To test if the decrease in  
229 apoptosis levels on day 4 relative to day 1 is correlated with aberrant synapsis, we  
230 performed immunostaining using antibodies against SYP-2, a central region protein  
231 (Colaiacovo *et al.* 2003), and HTP-3, an axial component of the SC (MacQueen *et al.*  
232 2002; Goodyer *et al.* 2008; Severson *et al.* 2009). In mid-pachytene stages, these  
233 proteins co-localize on the DAPI-stained tracks in young adult worms (Fig. S2),  
234 indicating proper formation of the SC. We observed similar patterns at all aging  
235 timepoints with no indications of loss or partial synapsis (Fig. S2). Thus, at least at the  
236 level of this observation, synapsis is not altered with germline aging. Taken together,  
237 these results open the possibility that factors other than synapsis and repair of DNA

238 double-strand breaks contribute to the increased apoptosis observed on day 4 after  
239 L4 in worm gonads.

240

### 241 **Germline aging leads to small reduction in crossover designation**

242 Interhomolog crossover recombination is dependent on proper repair of DNA  
243 double-strand breaks, and reduced crossovers have been suggested to play roles in  
244 aneuploidy in advanced aged mothers (reviewed in (Webster & Schuh 2017)). To  
245 determine if the reduction in RAD-51 foci numbers with maternal age are accompanied  
246 by changes in crossover designation, we examined the loading of GFP-tagged COSA-  
247 1 onto meiotic chromosomes. COSA-1 localizes to the single crossover site in each  
248 homolog pair in late prophase I (Yokoo *et al.* 2012) and is the earliest known marker  
249 for crossovers in *C. elegans*. At day 1, almost all nuclei (96%) in the last five rows of  
250 the pachytene stages of the young adult gonad showed six COSA-1 foci  
251 corresponding to the six crossovers sites per nucleus present in *C. elegans* (Fig. 3C,  
252 D). Aging led to a gradual decrease in crossover designation. On day 4, 10.4% of the  
253 nuclei had five foci, and on day 8, 22.5% had only five foci (Fig. 3C, D). Moreover, on  
254 day 8 after L4, 2% of the nuclei in late pachytene had only four COSA-1::GFP foci  
255 (Fig. 3C, D). Interestingly, a reduction in the number of COSA-1 foci was observed in  
256 late prophase I stages in *kin-18* mutants (Yin *et al.* 2016). Similar to the CED-1::GFP  
257 worms, almost all the worms of COSA-1::GFP transgenic strain died before day 10,  
258 thus we were unable to collect relevant data for that stage. These results suggest that  
259 aging leads to reduction in crossover recombination designation.

260

### 261 **The distance between homologous chromosomes increases in old worms**

262 In human, the percentage of meiotic chromosomal mis-segregation exponentially  
263 increases with maternal age (Hassold & Hunt 2001; Koehler *et al.* 2006). This has  
264 been attributed to the time oocytes are arrested, and, indeed, increased premature  
265 dissociation of chromosomes has been observed in oocytes in aging women  
266 (Subramanian & Bickel 2008; Lister *et al.* 2010; Tsutsumi *et al.* 2014). Nevertheless,  
267 the magnitude of premature dissociations is lower than the aneuploidy rate, suggesting  
268 that other factors control the arrested oocyte quality and potential to complete the  
269 divisions (Nagaoka *et al.* 2012). The increased levels of oocytes with only five COSA-  
270 1::GFP foci in old worms raises the possibility that aging leads to reduced crossovers,  
271 which in turn should lead to presence of univalent chromosomes in mature oocytes.  
272 In young adult worms, the six bivalents of *C. elegans* are almost always detected as  
273 six separate DAPI-stained bodies. When homologous chromosomes either do not  
274 undergo crossovers or separate before anaphase I, more than six bodies are  
275 expected. We did not observe an increase in extra bodies in aged oocytes (Fig. 1A).  
276 In fact, we noticed an increase in the number of oocytes in which the bivalents were  
277 in very close proximity, and these chromosomes seemed connected at the resolution  
278 level of our microscopy system (12.5% of the mature oocytes contained 5 bivalents at  
279 day 10 vs. 3% at day 1, Fig. 1A, N = 32). This suggests that aging does not lead to  
280 nuclei with non-crossover chromosomes; however, nuclei with non-crossover  
281 chromosomes may be removed by apoptosis.

282 Although homologs are attached during diakinesis, we hypothesize that this  
283 attachment weakens with age. This hypothesis predicts that homologs in aged oocytes  
284 are more spatially separated than in young oocytes, as previously observed in mouse  
285 and human (Gruhn *et al.* 2019; Zielinska *et al.* 2019). To test this hypothesis, we used  
286 a fluorescence microscope to capture the 3D chromatin density of the chromosomes

287 in mature oocytes in both young and menopausal worms (Fig. 4A). To identify  
288 individual chromosomes within each pair of homologs, we used an unbiased 3D  
289 Gaussian-mixture model with two Gaussians that was fitted to the measured chromatin  
290 density. The spatial separation between the homologs was quantified by projecting all  
291 images in the z-stack into a single 2D chromatin density map and calculating the 2D  
292 distance ( $L$ ) between the projected centers of the two Gaussians (Fig. 4B). This  
293 analysis showed that  $L$  is significantly longer in oocytes of menopausal vs. young  
294 worms (Fig. 4C).

295 If this longer distance is caused by weakening of the sister chromatid cohesion, then  
296 less chromatin is expected to be present at the interface between the two homologs  
297 (known as the short arms). To test this prediction, we analyzed the fluorescence profile  
298 between the two peaks of the projected 2D chromatin map along the line  $L$ . We define  
299  $H$  as the fluorescence difference between the minimum value along  $L$  and the mean  
300 height of the two Gaussians centers (Fig. 4D). The value of  $H$  is significantly greater  
301 in menopausal worms than in young worms, suggesting that, indeed, there is less  
302 chromatin at the short arms. To further verify these results, we used the Jensen–  
303 Shannon divergence to quantify the overlap between the two Gaussian probability  
304 distributions in 3D as described (Lin 1991; Endres & Schindelin 2003). We found  
305 significantly lower levels of overlap between the homologs in menopausal worms than  
306 in young worms (Fig. 4E), supporting the finding that homologs in menopausal worms  
307 are more spatially separated than in younger worms.

308 Interestingly, when we imaged oocytes in aged COSA-1::GFP worms, we noticed  
309 that 82.5% of the oocytes contained bivalents with double COSA-1 foci at the  
310 chiasmata region (Fig. 4F). Together with the DAPI staining, this observation supports  
311 the hypothesis that weakening of the sister chromatid cohesion around the chiasmata

312 reduces the binding of the homologs in older oocytes, thus increasing their spatial  
313 separation.

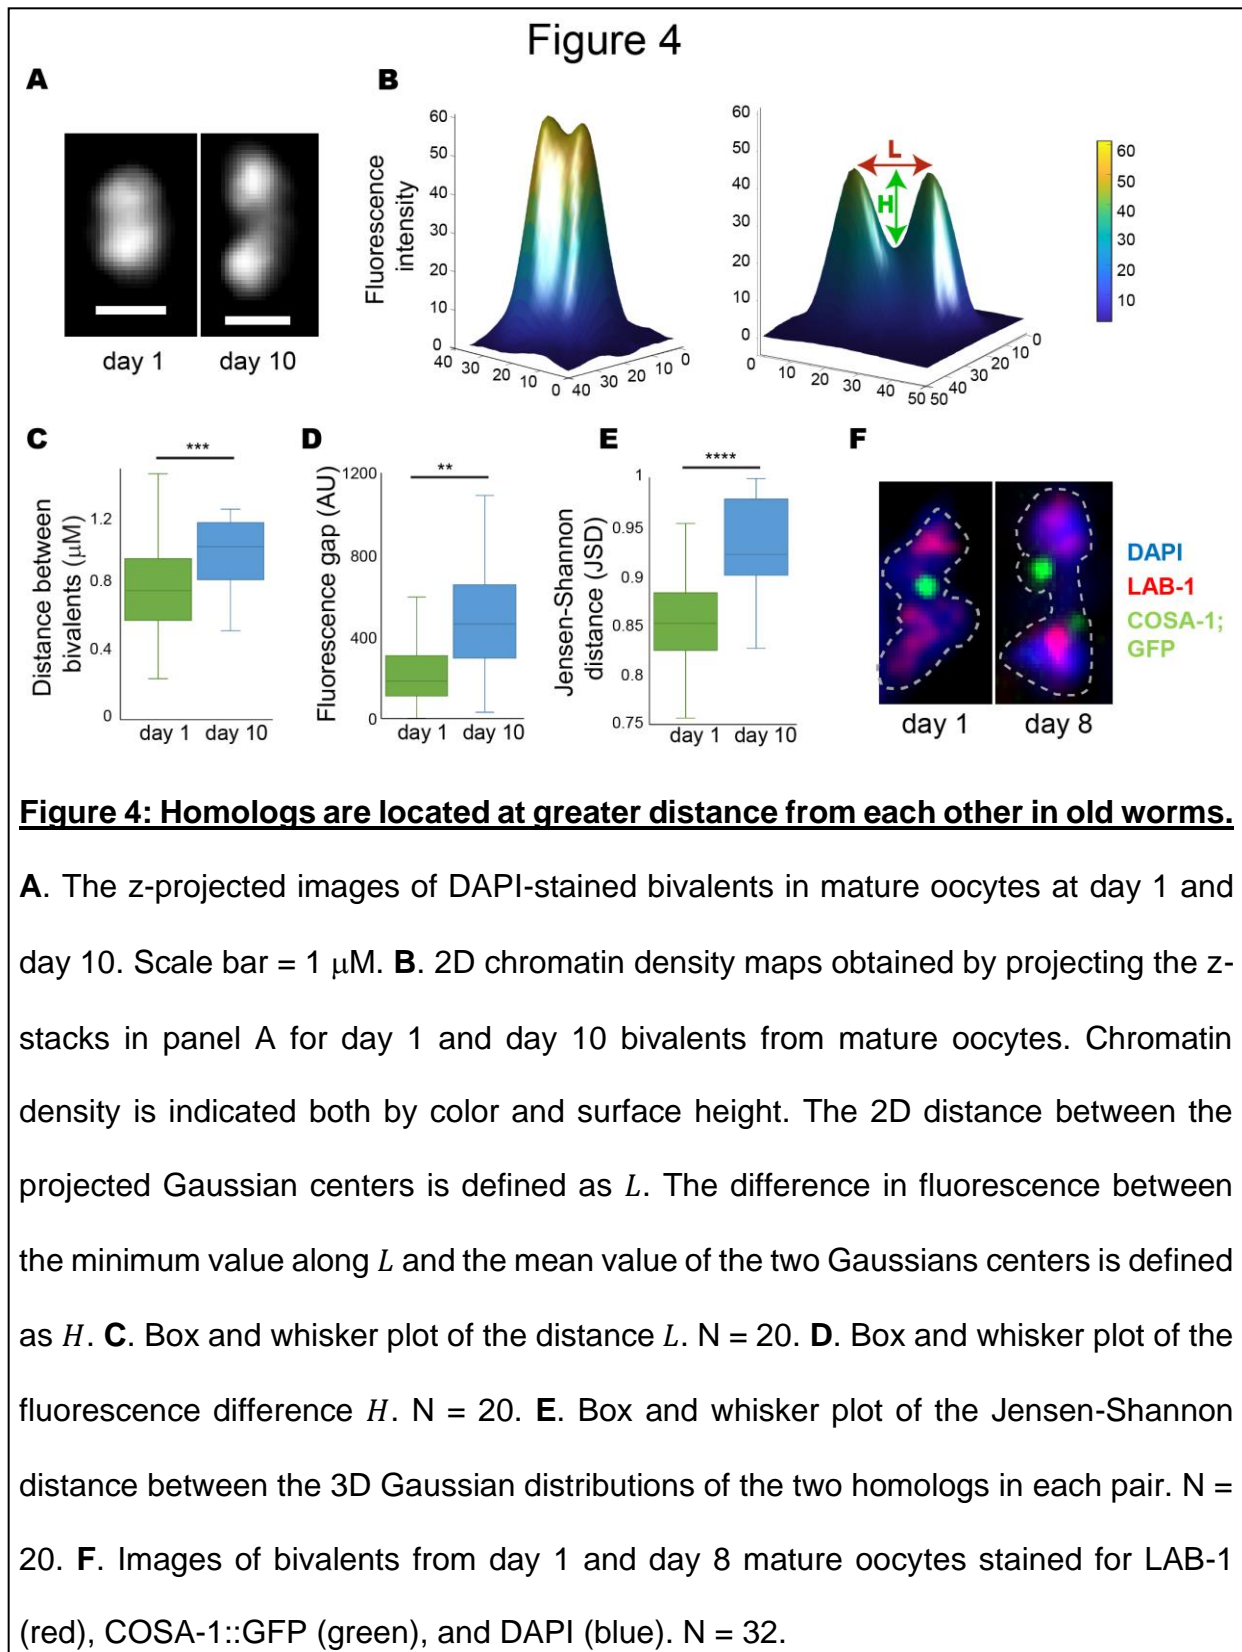

314



315 **Lower quality oocytes are present in aged germline**

316 In young adult worms, the diakinesis oocytes are stacked sequentially one after the  
317 other at the proximal end of the gonad. In aged worms, we found smaller oocytes  
318 which were aligned in multiple rows (Fig. 5A). Differential interference contrast (DIC)  
319 imaging confirmed that oocytes from aged worms were significantly smaller than those  
320 from young worms (Fig. 5B). Together with the presence of small oocytes, we also  
321 detected endomitotic nuclei starting at day 4. The number of endomitotic nuclei  
322 increased dramatically with age (30% at day 4, 87.5% at day 8, 96.3% at day 10; Fig.  
323 1A). Endomitotic nuclei are oocytes that have bypassed the prophase I diakinesis  
324 arrest but that have failed to fully complete anaphase I and likely undergo  
325 endoreduplication instead of mitosis (McGee *et al.* 2012). Collectively, these results

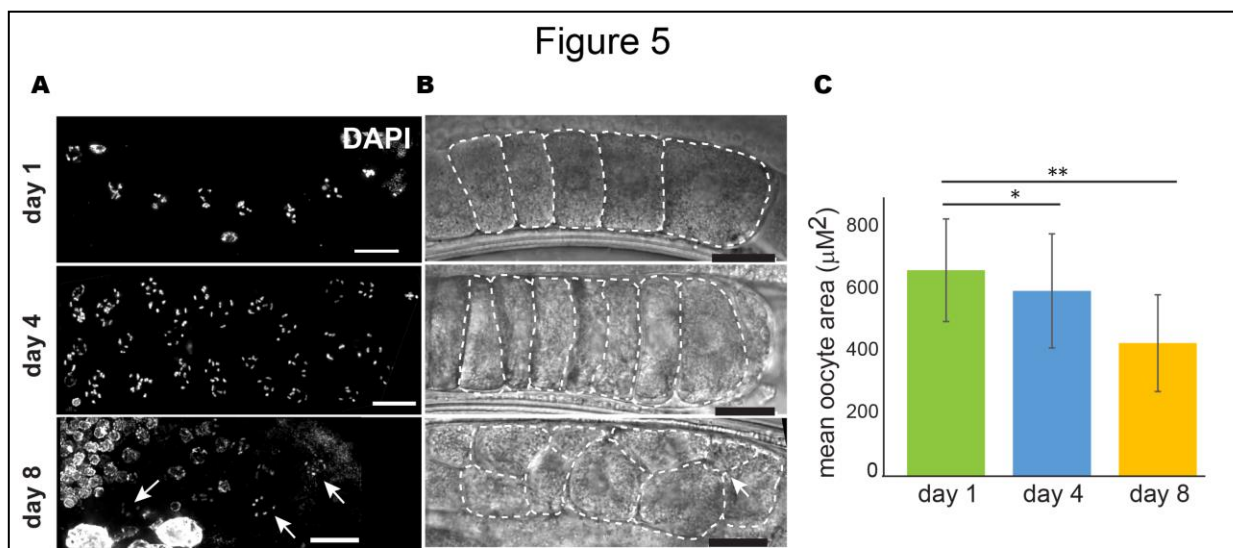

**Figure 5: Oocyte get smaller with age.** A and B. Proximal end of gonad arms at the indicated ages A) stained with DAPI and imaged with fluorescence microscopy and B) imaged with DIC. Arrows indicate pairs of diakinesis nuclei in the same row. White dashed lines indicate the circumference of the mid plane of oocytes. Scale bar = 10  $\mu\text{M}$ . C. Average area of oocytes at the different ages. Mann-Whitney  $p$  value: \* $<0.05$ , \*\* $<0.01$ . N = 6 gonads.

326 suggest that the arrest of oocytes in *C. elegans* can lead to various aberrations  
327 including lower quality oocytes, defective G2/M arrest, and reduced interhomolog  
328 cohesion.

329

### 330 **MAPK signaling dynamics changes in aged gonads**

331 We previously reported that a mutation in the *ogr-2* gene results in the development  
332 of small oocytes and endomitotic nuclei by day 3 post L4 (Achache *et al.* 2019). Similar  
333 phenotypes were observed in *lip-1* mutants (Hajnal & Berset 2002; Lee *et al.* 2006;  
334 Lin & Reinke 2008). The use of the *ogr-2* mutant strain is advantageous in germline  
335 studies, because unlike *lip-1*, its expression is limited to this tissue, and no somatic  
336 defects are observed in the deletion strain (Achache *et al.* 2019). Mutations in either  
337 of these genes lead to increased activation of MPK-1 in several regions of the gonads  
338 including mature oocytes at both day 1 and day 4 (Fig. S3) (Achache *et al.* 2019). The  
339 similarities between the phenotypes of old wild-type worms and day 3 mutant worms  
340 of these MPK-1 regulators, raise the hypothesis that MPK-1 activation changes with  
341 maternal age. Therefore, we stained the gonads of days 1, 4, 8, and 10 worms with  
342 an antibody directed against the phosphorylated (activated) form of MPK1 (dpMPK-  
343 1). As was previously demonstrated in young adult worms (Church *et al.* 1995; Lackner  
344 & Kim 1998; Kritikou *et al.* 2006; Lee *et al.* 2007; Arur *et al.* 2011; Yin *et al.* 2016;  
345 Narbonne *et al.* 2017), MPK-1 activation is restricted to two main regions of the gonad,  
346 the mid- to late-pachytene and the late diakinesis stages (Fig. 6). We observed that  
347 as the worm ages, MPK1 becomes ectopically activated in other regions of the gonad  
348 such as the proliferative zone, the leptotene/zygotene, and the diplotene as it is in  
349 young adult *lip-1* and *ogr-2* worms (Fig. 6) (Achache *et al.* 2019). The ectopic activation

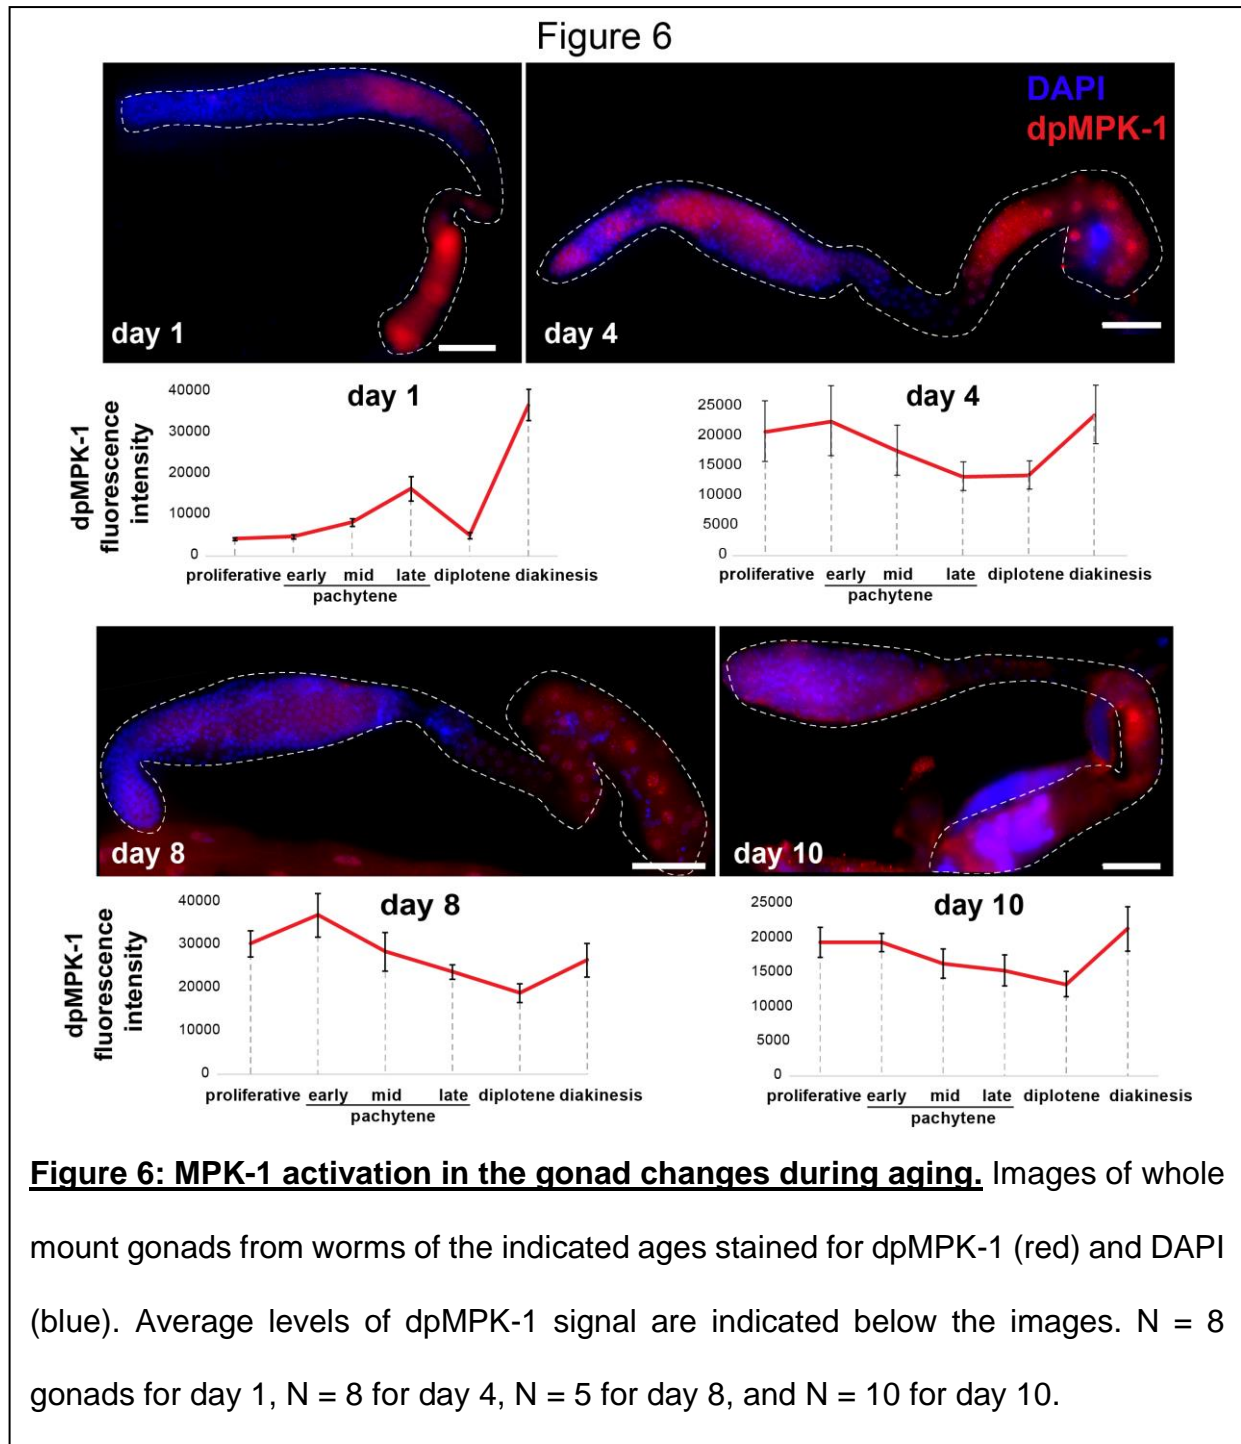

350 at diplotene was shown to lead to increased apoptosis in the germline of these strains  
351 (Rutkowski *et al.* 2011; Perrin *et al.* 2013). Importantly, unlike on day 1, at days 4, 8,  
352 and 10, the levels of dpMPK-1 staining at late diakinesis was similar to that at other  
353 stages (Fig. 6), probably due to depletion of sperm which activates MPK-1 through the  
354 major sperm protein MSP (Miller *et al.* 2001; Han *et al.* 2010). These results

355 demonstrate that during germline aging, there is a change in dpMPK-1 staining  
356 dynamics along the gonad indicating that, like oogenesis progression, germline aging  
357 is linked to a change in MPK-1 activation.

358

### 359 **Aged oocyte quality can be controlled by attenuation of MAPK signaling**

360 Our findings that wild-type oocytes of aged worms have similar morphology to  
361 young oocytes with high levels of MPK-1 activation suggest that MAPK signaling  
362 influences oocyte quality throughout aging. To test this hypothesis, we compared the  
363 viability of aged fertilized oocytes with high and low levels of MAPK activation. This  
364 assay was established previously to evaluate oocyte quality (Andux & Ellis 2008). At  
365 4 days post L4, wild-type, *lip-1*, and *ogr-2* worms were mated with young adult wild-  
366 type males. In these worms, the self-sperm was depleted approximately 24 hours  
367 before mating, so the oocytes were arrested for about one day. Between 8 and 12  
368 hours after the introduction of males, adult worms (hermaphrodites and males) were  
369 removed, and the numbers of fertilized embryos were counted (Fig. 7A). This time  
370 window was chosen because we aimed to evaluate the quality of the embryos that  
371 originated from the stacked and aged oocytes only. After this window, the embryos  
372 laid could be meiocytes at the pachytene stage during the arrest. The hatched  
373 embryos were scored 24 and 48 hours after the removal of adult worms to assess  
374 embryonic viability. We found that the embryonic viability in mature wild-type mated  
375 worms was  $67.1 \pm 18.5\%$ . In contrast, the embryonic viability was significantly lower in  
376 mutants with higher MPK-1 activation:  $44.7 \pm 28\%$  for *ogr-2* and  $22.6 \pm 28\%$  for *lip-1*  
377 (Fig. 7B). The difference between the two mutants could result from either different  
378 levels of MPK-1 activation (Fig. S3) or from somatic effects that exist in *lip-1* mutants

379 but not in *ogr-2* mutants. We conclude that the quality of oocytes produced under  
380 conditions of MPK-1 overactivation is relative to the quality of oocytes produced from  
381 wild-type worms at the same aging step.

382 Our hypothesis that the quality of arrested oocytes is determined by MPK-1  
383 activation further predicts that reducing the levels of MPK-1 in the gonads will lead to  
384 an improvement in oocyte quality. MPK-1 mutants are either non-viable or lead to  
385 oogenesis arrest at late pachytene (Church *et al.* 1995), precluding mating  
386 experiments under similar conditions. We therefore used RNA silencing to partially  
387 reduce the levels of MPK-1 in the gonads. To specifically reduce the germline

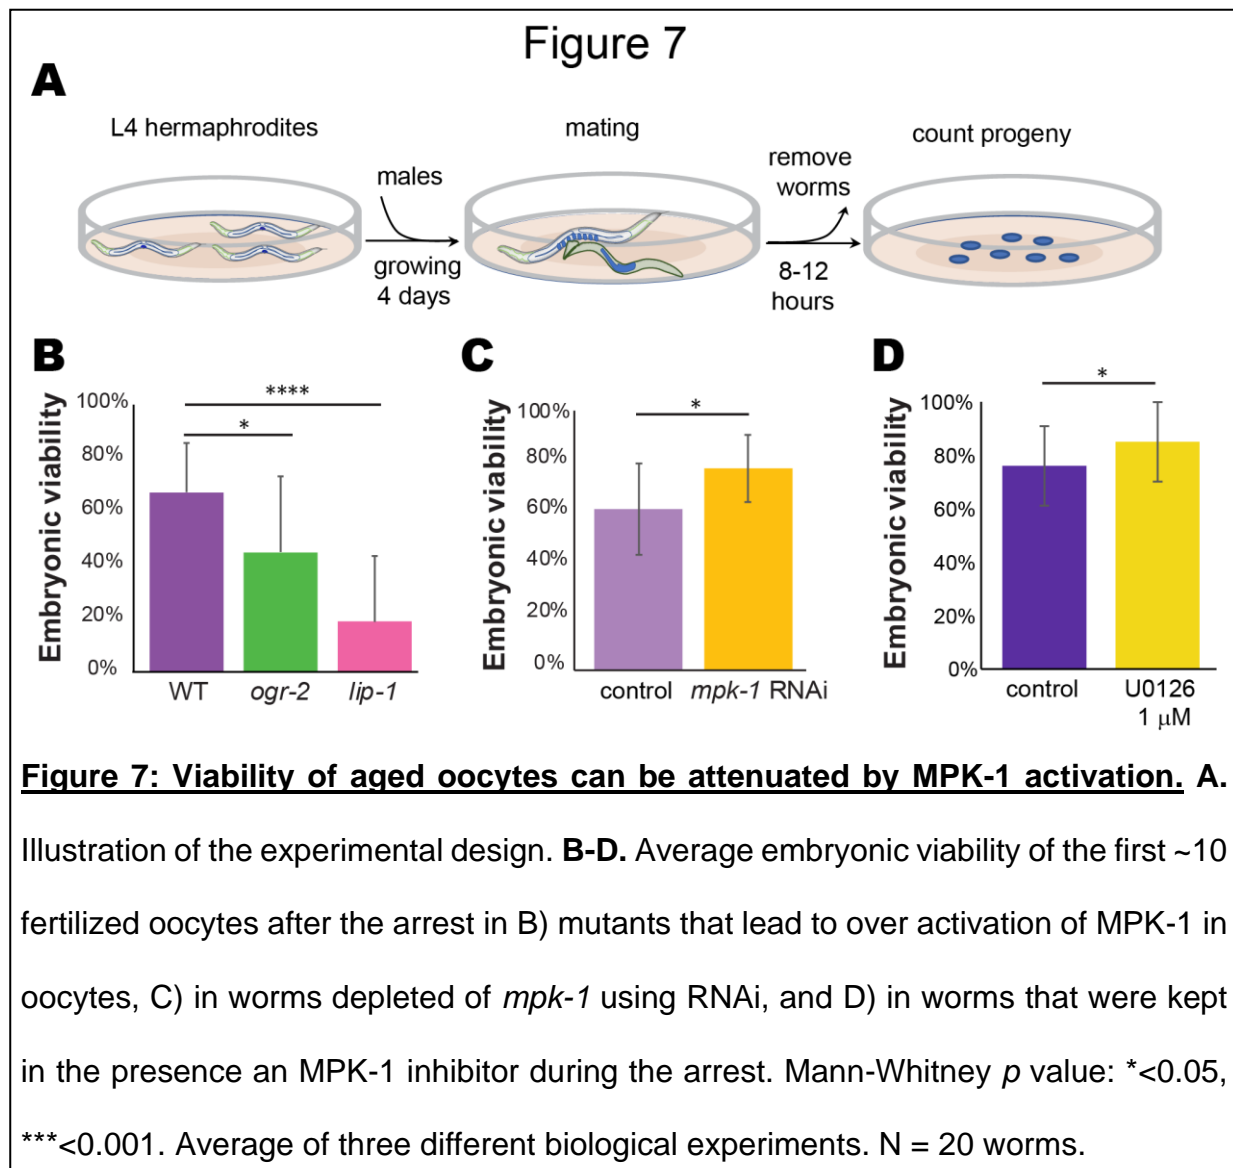

388 expression of MPK-1, we used the *rrf-1* strain in which somatic RNAi is reduced or  
389 abolished (Sijen *et al.* 2001). We found that the embryonic viability was significantly  
390 increased in oocytes with reduced *mpk-1* expression as compared to control RNAi  
391 ( $77.9\pm 12.8\%$  vs.  $66.2\pm 17.7\%$ , respectively) (Fig. 7C). This result suggests that  
392 reducing MAPK signaling in arrested oocytes increases their quality and ability to  
393 successfully complete meiotic divisions or embryogenesis.

394 To test this, we used the specific ERK inhibitor U0126, which was shown to reduce  
395 MPK-1 activation in worm gonads (Morgan *et al.* 2010; Okuyama *et al.* 2010).  
396 Following self-sperm depletion, mature worms were moved to NGM plates containing  
397 the U0126 inhibitor. After 24 hours, the worms were returned to normal plates without  
398 the inhibitor, and the quality of the arrested oocytes was assessed by measuring the  
399 embryonic lethality of the first embryos that were laid after mating. We found that the  
400 quality of oocytes from worms exposed to the inhibitor was significantly increased  
401 compared to control worms (Fig. 7D). These results suggest that oocyte quality can  
402 be extended by reducing the MAPK signaling, even after oocytes are formed.

403

## 404 Discussion

405 The classical model of aging defines it as the collective physiological processes that  
406 gradually decline, fail, and eventually lead to health deterioration and death over time  
407 (Lopez-Otin *et al.* 2013). The importance of focusing on oocyte aging, and the ways it  
408 can be delayed, is highlighted by the fact that oogenesis is one of the first processes  
409 to fail in humans and worms. Through careful analysis of oogonial processes along  
410 four critical points in the reproductive aging of *C. elegans*, we found an inherent  
411 signaling pathway that regulates oocyte aging. Our analyses indicate that several

412 processes deteriorate with age. Indeed, we observed that the number of germ cells  
413 decreases, nuclei with a crescent shape morphology tend to disappear, the distance  
414 between the homologous chromosomes in mature oocytes increases, and there is a  
415 reduction in germ cell proliferation, crossover designation, and RAD-51 foci. In old  
416 worms the oocytes were smaller, and diakinetik nuclei were observed distally. In  
417 contrast, there were no differences in either synapsis or chiasmata formation between  
418 young and old worms.

419 When compared to previous work, one must keep in mind several differences. First,  
420 most previous analyses of oocytes at various aging stages (e.g., (Templeman &  
421 Murphy 2018)) used feminized mutants, whereas we strictly used the N2 wild-type  
422 strain. Thus, oocyte aging in our analyses started at the day 3 of adulthood, and not  
423 at day 1 as in the feminized strains. This difference may change the effects originating  
424 from somatic aging. Second, to reduce the number of days one has to move the worms  
425 to fresh plates due to the self-progeny, provide food, and avoid contamination, we kept  
426 the worms at 25 °C. Maintaining the worms at 25 °C allowed assessment of oocyte  
427 aging at day 4 when oocytes start to stack and arrest in contrast to day 5, at which this  
428 occurs in worms maintained at 20 °C. It is theoretically possible that differences in the  
429 aging dynamics exist between the two temperatures (Bilgir *et al.* 2013); however, our  
430 results are in agreement with previous publications (Hughes *et al.* 2007; Lim *et al.*  
431 2008; Pickett *et al.* 2013; de la Guardia *et al.* 2016; Kocsisova *et al.* 2019) in terms of  
432 proliferation and oocyte morphology.

433 Some of our results can be explained by the halt in ovulation. This halt, which is  
434 mediated by the lack of sperm (McCarter *et al.* 1999), leads to oocyte stacking, and  
435 germ cell proliferation reduction, which together with ongoing apoptosis, leads to  
436 reduction in germ cell number. The disappearance of LZ nuclei can be the result of

437 developmental progression of early meiocytes nuclei into pachytene, beyond the RAD-  
438 51 removal stage, without spatial movement, which explains the lower number of RAD-  
439 51 foci we found in aging gonads. The stacked oocytes gradually utilize their yolk and  
440 become smaller, whereas sister chromatid cohesion gradually weakens leading to  
441 homolog distancing and splayed COSA-1 signal.

442 Nevertheless, other results cannot be explained by this simplified ovulation model:  
443 the loss of oogenesis progression control, the increase in apoptosis in day 4 and  
444 appearance of endomitotic nuclei in aging oocytes. All these phenotypes have been  
445 connected in the past with aberrant MAPK signaling (Church *et al.* 1995; Lackner &  
446 Kim 1998; Hajnal & Berset 2002; Kritikou *et al.* 2006; Lee *et al.* 2007; Arur *et al.* 2011;  
447 Cha *et al.* 2012; Perrin *et al.* 2013; Yin *et al.* 2016; Narbonne *et al.* 2017; Achache *et*  
448 *al.* 2019), and indeed we found a dramatic change in the activation dynamics of MPK-  
449 1 in the gonads of aging worms. Together, this led us to suggest that MAPK signaling  
450 is a driver of the changes that occur in the aging germline. Several lines of evidence  
451 support this model. First, we found a dramatic alteration in the dynamics of MPK-1  
452 activation during aging. Second, we found changes in proliferation, oogenesis staging,  
453 apoptosis, crossover designation, size of oocytes, and endomitosis, all previously  
454 shown to be controlled by MAPK (Lee *et al.* 2007). For example, we previously showed  
455 that ectopically high MPK-1 activation in the LZ region is associated with reduced LZ  
456 population (Achache *et al.* 2019), and Yin *et al.* showed that changes in local MPK-1  
457 activation are associated with the appearance of diakinesis nuclei distally (Yin *et al.*  
458 2016). Most importantly, here we showed that the period during which oocytes are of  
459 high quality can be extended or shortened by reducing or increasing, respectively, the  
460 level of MPK-1 activation using genetic and pharmacological tools. Taken together,  
461 we suggest that aging leads to a change in MAPK signaling in the gonad.



462 Phosphorylation of downstream targets collectively lead to the different oogonal  
463 alternations. The change in MAPK signaling could be the result of germline intrinsic  
464 and/or extrinsic signals that come through the gonad sheath cells and/or as a result of  
465 lack of sperm (Miller *et al.* 2003; Govindan *et al.* 2006; Govindan *et al.* 2009; Li *et al.*  
466 2012). A previous report showed that the IIS, known to control both longevity and  
467 germline aging, is inactivated in the absence of food leading to reduced MPK-1  
468 activation and stalled oogenesis (Lopez *et al.* 2013). It is therefore possible that the  
469 IIS also works through MPK-1 to attenuate oogenesis progression and thus determine  
470 germline aging. In the future it will be interesting to test this hypothesis and to evaluate  
471 whether other signaling pathways influence germline aging (Qin & Hubbard 2015;  
472 Templeman & Murphy 2018) by attenuating MAPK signaling in the gonad. This will  
473 place MAPK as a link between the external signals and the internal processes of  
474 germline aging.

475 Our work, together with that of others (Hughes *et al.* 2007; Webster & Schuh 2017;  
476 Gruhn *et al.* 2019; Zielinska *et al.* 2019), highlight similarities in reproductive aging  
477 between worms and mammals. In both systems oocyte quality reduces with age, and  
478 the probability that oogenesis will be completed decreases with age. Changes in  
479 crossover were linked to age-related infertility in humans, and it also changes during  
480 worm reproductive aging ((Lim *et al.* 2008) and this work). Importantly, we found  
481 indications that aging leads to reduced sister chromatid cohesion in aged oocytes, as  
482 was also recently shown for mouse and human oocytes. If indeed the effects of MAPK  
483 on oocyte quality and maturation during aging are evolutionarily conserved, it will be  
484 critical to identify intrinsic downstream factors in the pathway that control oocyte aging  
485 in order to get deeper insights into human reproductive decline.

486 A landmark paper published by López-Otín et al. identified major features that  
487 constitute the hallmarks of aging (Lopez-Otin *et al.* 2013). Although this publication  
488 was focused on lifespan and healthspan, it defined the criteria for an aging hallmark:  
489 it appears during normal aging, its increase leads to accelerated aging and its  
490 reduction to slower aging. MAPK signaling can be regarded as a hallmark of oocyte  
491 aging by these criteria: First, MPK-1 activation levels in the oocytes change during  
492 normal aging. Second, when MPK-1 activation is increased as in *lip-1* and *ogr-2*  
493 oocytes, they age faster; mutant oocytes are smaller and more prone to pass the G2/M  
494 arrest, and the resulting embryo is less likely to complete embryogenesis. Most  
495 importantly, decreasing MPK-1 levels, by both RNAi and pharmacological inhibition,  
496 improved embryo viability. We conclude that our results indicate that MAPK is a major  
497 signaling pathway that attenuates oocyte aging.

498

## 499 **Methods and materials**

### 500 **Strains and alleles**

501 All strains were cultured under standard conditions at 25 °C except for mating  
502 experiments, (*lip-1*, *ogr-2*, RNAi and ERK inhibitor) which were conducted at 20° C  
503 (Brenner 1974). The N2 Bristol strain was used as the wild-type background. Worms  
504 were grown on NGM plates with *Escherichia coli* OP50 (Brenner 1974). The following  
505 mutations and chromosome rearrangements were used LGI: *rrf-1(ok589)*, LGII: *ogr-*  
506 *2(huj1)*, *mels8* [*pie-1p::GFP::cosa-1 + unc-119(+)*], LGIV: *lip-1(zh15)*, LGV: *bcls39*  
507 [*Plim-7::ced-1::gfp+lin15(+)*].

508

### 509 **Reproductive span analysis**

510 To verify the effect of aging on the worm fertility, 400 L4 worms were placed on  
511 seeded NGM plates, transferred to new plates every 24 hours, and their embryos, non-  
512 fertilized oocytes, and hatched progeny were counted for 10 days at 25 °C.

513

#### 514 **Gonad nuclei quantification**

515 The numbers of nuclei at each meiotic stage, from the distal tip to the end of  
516 pachytene, were counted manually on DAPI-stained gonads as was previously  
517 described (Achache *et al.* 2019).

518

#### 519 **Cytological analysis and immunostaining**

520 Immunostaining of dissected gonads was carried out as described (Colaiacovo *et*  
521 *al.* 2003; Saito *et al.* 2009). Worms were permeabilized on Superfrost+ slides for 2 min  
522 with methanol at -20° and fixed for 30 min in 4% paraformaldehyde in PBS. After  
523 blocking with 1% BSA in PBS containing 0.1% Tween 20 (PBST) for 1 h at room  
524 temperature, slides were incubated with primary antibody for 1 h at room temperature.  
525 After incubation with fluorescent secondary antibody 1 h at room temperature, slides  
526 were DAPI stained for 10 min at 500 ng/ml, destained 1 h in PBST, and mounted with  
527 Vectashield (Vector Laboratories). The primary antibodies used were as follow: rabbit  
528  $\alpha$ -LAB-1 (1:200, (de Carvalho *et al.* 2008)), rabbit  $\alpha$ -RAD-51 (1:10,000, SDIX), mouse  
529  $\alpha$ -MAPK-YT (1:500, M8159; Sigma), rabbit  $\alpha$ -SYP-2 (1:200, a kind gift from S.  
530 Smolikove), rabbit  $\alpha$ -pH3 (D5692, 1:1000; Sigma), and guinea pig  $\alpha$ -HTP-3 (1:200,  
531 (Goodyer *et al.* 2008)). The secondary antibodies used were Cy2-donkey anti-rabbit,  
532 Cy3-donkey anti-guinea pig, Cy3-goat anti-rabbit, Cy3-goat anti-mouse (all used at  
533 1:500 dilution; Jackson ImmunoResearch Laboratories).

534

### 535 **Imaging and microscopy**

536 Images were acquired using the Olympus IX83 fluorescence microscope system  
537 (Olympus). Optical z-sections were collected at 0.30/0.60- $\mu\text{m}$  increments with a  
538 Hamamatsu Orca Flash 4.0 v3 and CellSens Dimension imaging software (Olympus).  
539 Images were deconvolved using AutoQuant X3 (Media Cybernetics).

540

### 541 **Oocyte size measurement**

542 Measurements were performed on whole worms mounted in M9 and visualized  
543 using DIC microscopy (Sulston & Horvitz 1977). Mid-oocytes plane areas were  
544 measured with ImageJ software.

545

### 546 **Quantitative analysis of germ cell apoptosis**

547 Germ cell corpses were scored in adult hermaphrodites using CED-1::GFP as  
548 described (Zhou *et al.* 2001) . Worms were transferred onto a drop of M9 on 1.5%  
549 agarose pads on slides and visualized. Statistical analyses were performed using the  
550 two-tailed Mann–Whitney *U*-test (95% C.I.).

551

### 552 **Quantification of immunofluorescence signals**

553 Activated MPK-1 fluorescence intensity was quantified on raw images taken from  
554 whole-mounted gonads of wild-type worms at the different aging phases stained with  
555 an anti-dpMPK-1 antibody using the same experimental conditions and identical

556 acquisition parameters. ImageJ software was used to measure the fluorescence  
557 intensity level throughout the entire length of the gonad.

558

### 559 **Time-course analysis for RAD-51 foci**

560 The average RAD-51 foci number per nucleus was scored in each meiotic stage of  
561 the germline. Statistical comparisons between the different aging stages were  
562 performed using the two-tailed Mann–Whitney *U*-test (95% C.I.).

563

### 564 **Quantification of COSA-1 foci**

565 For quantification of GFP::COSA-1 foci, nuclei that were in the last four-to-five rows  
566 of late pachytene and were completely contained within the image stack were  
567 analyzed. Foci were quantified manually from deconvolved 3D stacks.

568

### 569 **Quantification of the distance between the homologs**

570 DAPI-stained images of the bivalents were recorded in z-stacks with vertical  
571 separation of  $\Delta z = 0.3\mu m$  and horizontal pixel resolution of  $\Delta x = \Delta y = 0.064\mu m$ . To  
572 simplify the analysis, we selected bivalents in which the homolog interface (short arms)  
573 was parallel to the z axis (Fig. 4A). 3D fluorescence data were represented as a 3D  
574 matrix such that each voxel  $(i, j, k)$  has a measured fluorescence value  $F(i, j, k)$ . First,  
575 we performed clustering-based segmentation in 3D to isolate the relevant bivalents.  
576 We then fitted the 3D fluorescence data to a Gaussian mixture model (GMM) with two  
577 Gaussians. Because GMM fitting operates on a point cloud rather than on a scalar  
578 intensity field, we represented the fluorescence matrix as a point cloud, in which the

579 occurrence of each voxel's coordinates is proportional to its fluorescence. Hence, the  
580 coordinates of each voxel  $(i, j, k)$  appeared in the point cloud  $\text{round}[0.1 \cdot F(i, j, k)]$   
581 times. The value of 0.1 was chosen to reduce the point-cloud's size and speed up  
582 computation time; we verified that the results are unchanged when using a value of 1.  
583 GMM fitting was performed in Matlab<sup>TM</sup> using the `fitgmdist` function with 20 replicates  
584 and 100 iterations per replicate. This procedure resulted in two Gaussians per bivalent,  
585 where each Gaussian is described by its mean (point in 3D) and  $3 \times 3$  standard  
586 deviation matrix.

587 2D fluorescence density maps were obtained by summing all z-slices in a stack  
588 along the z direction. Such projections are shown in Fig. 4B, in which fluorescence is  
589 represented both by surface height and color code. The mean of each Gaussian was  
590 also projected onto the 2D map. The projection of each mean is very close to the two  
591 peaks in the 2D map due to the z-orientation of the bivalents in the raw data. The 2D  
592 distance  $L$  between the two bivalents was defined as the 2D distance between the 2D  
593 projected positions of the Gaussian means (Fig. 4B). The gap between the bivalent  
594 was further characterized by defining  $H$  as the fluorescence difference between the  
595 minimum value along  $L$  and the mean 2D fluorescence values at the two projected  
596 centers of the Gaussians (Fig. 4B). The overlap between the bivalents was quantified  
597 using the Jensen–Shannon Divergence (JSD), which measures the overlap between  
598 two probability distributions on a scale between 0 and 1 (Lin 1991; Endres & Schindelin  
599 2003). A JSD value of 0 means the two distributions have no overlap, and a JSD value  
600 of 1 implies the two distributions are identical. To calculate JSD between the  
601 Gaussians fitted to the two bivalents, we first calculated the value of each Gaussian in  
602 each voxel and then normalized each Gaussian to 1, to make it a probability

603 distribution. If  $P_n$  and  $Q_n$  are the values of the two Gaussians in the  $n$ 'th voxel and  
604  $M_n = \frac{1}{2}(P_n + Q_n)$ , then the JSD is given by the sum over all voxels:

$$605 \quad JSD = \frac{1}{2} \sum_n \left[ P_n \log_2 \frac{P_n}{M_n} + Q_n \log_2 \frac{Q_n}{M_n} \right]$$

606

### 607 **Male generation**

608 Young wild-type adult males were generated by crossing wild-type L4  
609 hermaphrodites with wild-type males and growing for 3 days at 20 °C.

610

### 611 **Mating experiments**

612 Twenty L4 worms were placed on seeded NGM plates and grown for 4 days at 20  
613 °C. Hermaphrodites that have depleted their stock of sperm were mated with five  
614 males for 8-12 hours. This period corresponds to the time that takes the worms to lay  
615 between 10 to 15 eggs that originate from stacked oocytes. Hermaphrodites and  
616 males were then removed from the plate, and the embryos were counted immediately.  
617 Plates were scored for a second time after 24 hours. Embryos that had not hatched  
618 were marked as dead.

619

### 620 **Germline specific RNAi**

621 Feeding RNAi experiments were performed at 20 °C as described (Govindan *et al.*  
622 2006; Govindan *et al.* 2009). The control experiment was performed by feeding HT115  
623 bacteria carrying the empty pL4440 vector. A feeding vector from the *C. elegans* RNAi

624 collection (Source Biosciences) was used to deplete *mpk-1*. To study the germline-  
625 specific functions of MPK-1 in *C. elegans*, we used mutants of *rrf-1* strain, which  
626 encodes an RNA-directed RNA polymerase, to allow RNAi to be effective mostly in  
627 the germline (Sijen *et al.* 2001). Note that a previous report has shown that in some  
628 cases the RNAi in this strain also occurs in somatic tissues (Kumsta & Hansen 2012).  
629 Day 3 post L4, *rrf-1* adult worms were placed on either *mpk-1* RNAi or control RNAi  
630 plates for 24 hours. They were then transferred to regular plates (to enable ovulation)  
631 and mated as described above.

632

### 633 **MPK-1 inhibitor assay**

634 The MPK-1 inhibitor U0126 (1,4-diamino-2,3-dicyano-1,4-bis[2-aminophenylthio]  
635 butadiene monoethanolate) was purchased from Sigma. To test whether U0126  
636 influenced oocyte quality, we treated day 4 adults for 24 h with either DMSO or 1  $\mu$ M  
637 U0126. Adults were transferred to plates with 1  $\mu$ l of 10 mM U0126 or DMSO. After 24  
638 h, worms were transferred to regular NGM plates and mated with males. We then  
639 scored embryo production after 8-12 hours of mating as readout of oocyte quality.

640



641 **References**

642 Achache H, Laurent L, Hecker-Mimoun Y, Ishtayeh H, Rappaport Y, Kroizer E,  
643 Colaiacovo MP, Tzur YB (2019). Progression of Meiosis Is Coordinated by the Level  
644 and Location of MAPK Activation Via OGR-2 in *Caenorhabditis elegans*. *Genetics*.  
645 **212**, 213-229.

646 Alpi A, Pasierbek P, Gartner A, Loidl J (2003). Genetic and cytological  
647 characterization of the recombination protein RAD-51 in *Caenorhabditis elegans*.  
648 *Chromosoma*. **112**, 6-16.

649 Andux S, Ellis RE (2008). Apoptosis maintains oocyte quality in aging *Caenorhabditis*  
650 *elegans* females. *PLoS Genet*. **4**, e1000295.

651 Arur S, Ohmachi M, Berkseth M, Nayak S, Hansen D, Zarkower D, Schedl T (2011).  
652 MPK-1 ERK controls membrane organization in *C. elegans* oogenesis via a sex-  
653 determination module. *Dev Cell*. **20**, 677-688.

654 Bentov Y, Yavorska T, Esfandiari N, Jurisicova A, Casper RF (2011). The contribution  
655 of mitochondrial function to reproductive aging. *J Assist Reprod Genet*. **28**, 773-783.

656 Bhalla N, Dernburg AF (2005). A conserved checkpoint monitors meiotic chromosome  
657 synapsis in *Caenorhabditis elegans*. *Science*. **310**, 1683-1686.

658 Bilgir C, Dombecki CR, Chen PF, Villeneuve AM, Nabeshima K (2013). Assembly of  
659 the Synaptonemal Complex Is a Highly Temperature-Sensitive Process That Is  
660 Supported by PGL-1 During *Caenorhabditis elegans* Meiosis. *G3 (Bethesda)*. **3**, 585-  
661 595.

662 Blagosklonny MV, Hall MN (2009). Growth and aging: a common molecular  
663 mechanism. *Aging (Albany NY)*. **1**, 357-362.

664 Bohnert KA, Kenyon C (2017). A lysosomal switch triggers proteostasis renewal in  
665 the immortal *C. elegans* germ lineage. *Nature*. **551**, 629-633.

666 Bohr T, Ashley G, Eggleston E, Firestone K, Bhalla N (2016). Synaptonemal Complex  
667 Components Are Required for Meiotic Checkpoint Function in *Caenorhabditis*  
668 *elegans*. *Genetics*. **204**, 987-997.

- 669 Brenner S (1974). The genetics of *Caenorhabditis elegans*. *Genetics*. **77**, 71-94.
- 670 Cha DS, Datla US, Hollis SE, Kimble J, Lee MH (2012). The Ras-ERK MAPK  
671 regulatory network controls dedifferentiation in *Caenorhabditis elegans* germline.  
672 *Biochim Biophys Acta*. **1823**, 1847-1855.
- 673 Chasnov JR (2013). The evolutionary role of males in *C. elegans*. *Worm*. **2**, e21146.
- 674 Church DL, Guan KL, Lambie EJ (1995). Three genes of the MAP kinase cascade,  
675 mek-2, mpk-1/sur-1 and let-60 ras, are required for meiotic cell cycle progression in  
676 *Caenorhabditis elegans*. *Development*. **121**, 2525-2535.
- 677 Colaiacovo MP, MacQueen AJ, Martinez-Perez E, McDonald K, Adamo A, La Volpe  
678 A, Villeneuve AM (2003). Synaptonemal complex assembly in *C. elegans* is  
679 dispensable for loading strand-exchange proteins but critical for proper completion of  
680 recombination. *Dev Cell*. **5**, 463-474.
- 681 Colaiacovo MP, Paques F, Haber JE (1999). Removal of one nonhomologous DNA  
682 end during gene conversion by a RAD1- and MSH2-independent pathway. *Genetics*.  
683 **151**, 1409-1423.
- 684 Couteau F, Zetka M (2005). HTP-1 coordinates synaptonemal complex assembly with  
685 homolog alignment during meiosis in *C. elegans*. *Genes Dev*. **19**, 2744-2756.
- 686 Crittenden SL, Kimble J (2008). Analysis of the *C. elegans* germline stem cell region.  
687 *Methods Mol Biol*. **450**, 27-44.
- 688 Crittenden SL, Leonhard KA, Byrd DT, Kimble J (2006). Cellular analyses of the  
689 mitotic region in the *Caenorhabditis elegans* adult germ line. *Mol Biol Cell*. **17**, 3051-  
690 3061.
- 691 Crittenden SL, Troemel ER, Evans TC, Kimble J (1994). GLP-1 is localized to the  
692 mitotic region of the *C. elegans* germ line. *Development*. **120**, 2901-2911.
- 693 de Carvalho CE, Zaaijer S, Smolikov S, Gu Y, Schumacher JM, Colaiacovo MP  
694 (2008). LAB-1 antagonizes the Aurora B kinase in *C. elegans*. *Genes Dev*. **22**, 2869-  
695 2885.

- 696 de la Guardia Y, Gilliat AF, Hellberg J, Rennert P, Cabreiro F, Gems D (2016). Run-  
697 on of germline apoptosis promotes gonad senescence in *C. elegans*. *Oncotarget*. **7**,  
698 39082-39096.
- 699 Duncan FE, Hornick JE, Lampson MA, Schultz RM, Shea LD, Woodruff TK (2012).  
700 Chromosome cohesion decreases in human eggs with advanced maternal age. *Aging*  
701 *Cell*.
- 702 Eichenlaub-Ritter U, Wiczorek M, Luke S, Seidel T (2011). Age related changes in  
703 mitochondrial function and new approaches to study redox regulation in mammalian  
704 oocytes in response to age or maturation conditions. *Mitochondrion*. **11**, 783-796.
- 705 Endres DM, Schindelin JE (2003). A new metric for probability distributions. *IEEE*  
706 *Transactions on Information Theory*. **49**, 1858-1860.
- 707 Gartner A, Boag PR, Blackwell TK (2008). Germline survival and apoptosis.  
708 *WormBook*, 1-20.
- 709 Goodyer W, Kaitna S, Couteau F, Ward JD, Boulton SJ, Zetka M (2008). HTP-3 links  
710 DSB formation with homolog pairing and crossing over during *C. elegans* meiosis. *Dev*  
711 *Cell*. **14**, 263-274.
- 712 Govindan JA, Cheng H, Harris JE, Greenstein D (2006). Galphao/i and Galphas  
713 signaling function in parallel with the MSP/Eph receptor to control meiotic diapause in  
714 *C. elegans*. *Curr Biol*. **16**, 1257-1268.
- 715 Govindan JA, Nadarajan S, Kim S, Starich TA, Greenstein D (2009). Somatic cAMP  
716 signaling regulates MSP-dependent oocyte growth and meiotic maturation in *C.*  
717 *elegans*. *Development*. **136**, 2211-2221.
- 718 Greenblatt EJ, Obniski R, Mical C, Spradling AC (2019). Prolonged ovarian storage  
719 of mature *Drosophila* oocytes dramatically increases meiotic spindle instability. *Elife*.  
720 **8**.
- 721 Gruber J, Yee Z, Tolwinski NS (2016). Developmental Drift and the Role of Wnt  
722 Signaling in Aging. *Cancers (Basel)*. **8**.

- 723 Gruhn JR, Zielinska AP, Shukla V, Blanshard R, Capalbo A, Cimadomo D, Nikiforov  
724 D, Chan AC, Newnham LJ, Vogel I, Scarica C, Krapchev M, Taylor D, Kristensen SG,  
725 Cheng J, Ernst E, Bjorn AB, Colmorn LB, Blayney M, Elder K, Liss J, Hartshorne G,  
726 Grondahl ML, Rienzi L, Ubaldi F, McCoy R, Lukaszuk K, Andersen CY, Schuh M,  
727 Hoffmann ER (2019). Chromosome errors in human eggs shape natural fertility over  
728 reproductive life span. *Science*. **365**, 1466-1469.
- 729 Hajnal A, Berset T (2002). The C.elegans MAPK phosphatase LIP-1 is required for  
730 the G(2)/M meiotic arrest of developing oocytes. *EMBO J*. **21**, 4317-4326.
- 731 Han SM, Cottee PA, Miller MA (2010). Sperm and oocyte communication  
732 mechanisms controlling C. elegans fertility. *Dev Dyn*. **239**, 1265-1281.
- 733 Hans F, Dimitrov S (2001). Histone H3 phosphorylation and cell division. *Oncogene*.  
734 **20**, 3021-3027.
- 735 Hassold T, Hunt P (2001). To err (meiotically) is human: the genesis of human  
736 aneuploidy. *Nat Rev Genet*. **2**, 280-291.
- 737 Hayashi M, Chin GM, Villeneuve AM (2007). C. elegans germ cells switch between  
738 distinct modes of double-strand break repair during meiotic prophase progression.  
739 *PLoS Genet*. **3**, e191.
- 740 Hayashi M, Mlynarczyk-Evans S, Villeneuve AM (2010). The synaptonemal complex  
741 shapes the crossover landscape through cooperative assembly, crossover promotion  
742 and crossover inhibition during Caenorhabditis elegans meiosis. *Genetics*. **186**, 45-  
743 58.
- 744 Hillers KJ, Jantsch V, Martinez-Perez E, Yanowitz JL (2017). Meiosis. *WormBook*, 1-  
745 43.
- 746 Hodgkin J (1983). Male Phenotypes and Mating Efficiency in CAENORHABDITIS  
747 ELEGANS. *Genetics*. **103**, 43-64.
- 748 Hughes SE, Evason K, Xiong C, Kornfeld K (2007). Genetic and pharmacological  
749 factors that influence reproductive aging in nematodes. *PLoS Genet*. **3**, e25.

- 750 Hughes SE, Huang C, Kornfeld K (2011). Identification of mutations that delay somatic  
751 or reproductive aging of *Caenorhabditis elegans*. *Genetics*. **189**, 341-356.
- 752 Kenyon CJ (2010). The genetics of ageing. *Nature*. **464**, 504-512.
- 753 Kim S, Spike C, Greenstein D (2013). Control of oocyte growth and meiotic maturation  
754 in *Caenorhabditis elegans*. *Adv Exp Med Biol*. **757**, 277-320.
- 755 Kocsisova Z, Kornfeld K, Schedl T (2019). Rapid population-wide declines in stem  
756 cell number and activity during reproductive aging in *C. elegans*. *Development*. **146**.
- 757 Koehler KE, Schrump SE, Cherry JP, Hassold TJ, Hunt PA (2006). Near-human  
758 aneuploidy levels in female mice with homeologous chromosomes. *Curr Biol*. **16**,  
759 R579-580.
- 760 Kritikou EA, Milstein S, Vidalain PO, Lettre G, Bogan E, Doukometzidis K, Gray P,  
761 Chappell TG, Vidal M, Hengartner MO (2006). *C. elegans* GLA-3 is a novel  
762 component of the MAP kinase MPK-1 signaling pathway required for germ cell  
763 survival. *Genes Dev*. **20**, 2279-2292-
- 764 Kumsta C, Hansen M (2012). *C. elegans* rrf-1 mutations maintain RNAi efficiency in  
765 the soma in addition to the germline. *PLoS One*. **7**, e35428.
- 766 Lackner MR, Kim SK (1998). Genetic analysis of the *Caenorhabditis elegans* MAP  
767 kinase gene mpk-1. *Genetics*. 103-117 ,150 .
- 768 Leacock SW, Reinke V (2006). Expression profiling of MAP kinase-mediated meiotic  
769 progression in *Caenorhabditis elegans*. *PLoS Genet*. **2**, e174.
- 770 Lee MH, Hook B, Lamont LB, Wickens M, Kimble J (2006). LIP-1 phosphatase  
771 controls the extent of germline proliferation in *Caenorhabditis elegans*. *EMBO J*. **25**,  
772 88-96.
- 773 Lee MH, Ohmachi M, Arur S, Nayak S, Francis R, Church D, Lambie E, Schedl T  
774 (2007). Multiple functions and dynamic activation of MPK-1 extracellular signal-  
775 regulated kinase signaling in *Caenorhabditis elegans* germline development.  
776 *Genetics*. **177**, 2039-2062.

- 777 Lettre G, Hengartner MO (2006). Developmental apoptosis in *C. elegans*: a complex  
778 CEDnario. *Nat Rev Mol Cell Biol.* **7**, 97-108.
- 779 Li X, Johnson RW, Park D, Chin-Sang I, Chamberlin HM (2012). Somatic gonad  
780 sheath cells and Eph receptor signaling promote germ-cell death in *C. elegans*. *Cell*  
781 *Death Differ.* **19**, 1080-1089.
- 782 Lim JG, Stine RR, Yanowitz JL (2008). Domain-specific regulation of recombination  
783 in *Caenorhabditis elegans* in response to temperature, age and sex. *Genetics.* **180**,  
784 715-726.
- 785 Lin B, Reinke V (2008). The candidate MAP kinase phosphorylation substrate DPL-1  
786 (DP) promotes expression of the MAP kinase phosphatase LIP-1 in *C. elegans* germ  
787 cells. *Dev Biol.* **316**, 50-61.
- 788 Lin J.(1991) Divergence measures based on the Shannon entropy. *IEEE Transactions*  
789 *on Information Theory.* **37**, 145-151.
- 790 Lister LM, Kouznetsova A, Hyslop LA, Kalleas D, Pace SL, Barel JC, Nathan A, Floros  
791 V, Adelfalk C, Watanabe Y, Jessberger R, Kirkwood TB, Hoog C, Herbert M (2010).  
792 Age-related meiotic segregation errors in mammalian oocytes are preceded by  
793 depletion of cohesin and Sgo2. *Curr Biol.* **20**, 1511-1521.
- 794 Lopez-Otin C, Blasco MA, Partridge L, Serrano M, Kroemer G (2013). The hallmarks  
795 of aging. *Cell.* **153**, 1194.1217-
- 796 Lopez AL, 3rd, Chen J, Joo HJ, Drake M, Shidate M, Kseib C, Arur S (2013). DAF-2  
797 and ERK couple nutrient availability to meiotic progression during *Caenorhabditis*  
798 *elegans* oogenesis. *Dev Cell.* **27**, 227-240.
- 799 Lord T, Aitken RJ (2013). Oxidative stress and ageing of the post-ovulatory oocyte.  
800 *Reproduction.* **146**, R217-227.
- 801 Lui DY, Colaiacovo MP (2013). Meiotic development in *Caenorhabditis elegans*. *Adv*  
802 *Exp Med Biol.* **757**, 133-170.

- 803 Luo S, Kleemann GA, Ashraf JM, Shaw WM, Murphy CT (2010). TGF-beta and insulin  
804 signaling regulate reproductive aging via oocyte and germline quality maintenance.  
805 *Cell*. **143**, 299-312.
- 806 Luo S, Shaw WM, Ashraf J, Murphy CT (2009). TGF-beta Sma/Mab signaling  
807 mutations uncouple reproductive aging from somatic aging. *PLoS Genet*. **5**, e1000789.
- 808 MacQueen AJ, Colaiacovo MP, McDonald K, Villeneuve AM (2002). Synapsis-  
809 dependent and -independent mechanisms stabilize homolog pairing during meiotic  
810 prophase in *C. elegans*. *Genes Dev*. **16**, 2428-2442.
- 811 McCarter J, Bartlett B, Dang T, Schedl T (1999). On the control of oocyte meiotic  
812 maturation and ovulation in *Caenorhabditis elegans*. *Dev Biol*. **205**, 111-128.
- 813 McGee MD, Day N, Graham J, Melov S (2012). cep-1/p53-dependent dysplastic  
814 pathology of the aging *C. elegans* gonad. *Aging (Albany NY)*. **4**, 25.6-269
- 815 Mendenhall AR, Wu D, Park SK, Cypser JR, Tedesco PM, Link CD, Phillips PC,  
816 Johnson TE (2011). Genetic dissection of late-life fertility in *Caenorhabditis elegans*.  
817 *J Gerontol A Biol Sci Med Sci*. **66**, 842-854.
- 818 Mets DG, Meyer BJ (2009). Condensins regulate meiotic DNA break distribution, thus  
819 crossover frequency, by controlling chromosome structure. *Cell*. **139**, 73-86.
- 820 Miller MA, Nguyen VQ, Lee MH, Kosinski M, Schedl T, Caprioli RM, Greenstein D  
821 (2001). A sperm cytoskeletal protein that signals oocyte meiotic maturation and  
822 ovulation. *Science*. **291**, 2144-2147.
- 823 Miller MA, Ruest PJ, Kosinski M, Hanks SK, Greenstein D (2003). An Eph receptor  
824 sperm-sensing control mechanism for oocyte meiotic maturation in *Caenorhabditis*  
825 *elegans*. *Genes Dev*. **17**, 187-200.
- 826 Morgan CT, Lee MH, Kimble J (2010). Chemical reprogramming of *Caenorhabditis*  
827 *elegans* germ cell fate. *Nat Chem Biol*. **6**, 102-104.
- 828 Nadarajan S, Mohideen F, Tzur YB, Ferrandiz N, Crawley O, Montoya A, Faull P,  
829 Snijders AP, Cutillas PR, Jambhekar A, Blower MD, Martinez-Perez E, Harper JW,

- 830 Colaiacovo MP (2016). The MAP kinase pathway coordinates crossover designation  
831 with disassembly of synaptonemal complex proteins during meiosis. *Elife*. **5**.
- 832 Nagaoka SI, Hassold TJ, Hunt PA (2012). Human aneuploidy: mechanisms and new  
833 insights into an age-old problem. *Nat Rev Genet*. **13**, 493-504.
- 834 Narbonne P, Maddox PS, Labbe JC (2017). DAF-18/PTEN signals through AAK-  
835 1/AMPK to inhibit MPK-1/MAPK in feedback control of germline stem cell proliferation.  
836 *PLoS Genet*. **13**, e1006738.
- 837 Okuyama T, Inoue H, Ookuma S, Satoh T, Kano K, Honjoh S, Hisamoto N, Matsumoto  
838 K, Nishida E (2010). The ERK-MAPK pathway regulates longevity through SKN-1 and  
839 insulin-like signaling in *Caenorhabditis elegans*. *J Biol Chem*. **285**, 30274-30281.
- 840 Pazdernik N, Schedl T (2013). Introduction to germ cell development in  
841 *Caenorhabditis elegans*. *Adv Exp Med Biol*. **757**, 1-16.
- 842 Perez MF, Francesconi M, Hidalgo-Carcedo C, Lehner B (2017). Maternal age  
843 generates phenotypic variation in *Caenorhabditis elegans*. *Nature*. **55**.106-109 ,2
- 844 Perrin AJ, Gunda M, Yu B, Yen K, Ito S, Forster S, Tissenbaum HA, Derry WB (2013).  
845 Noncanonical control of *C. elegans* germline apoptosis by the insulin/IGF-1 and  
846 Ras/MAPK signaling pathways. *Cell Death Differ*. **20**, 97-107.
- 847 Pickett CL, Dietrich N, Chen J, Xiong C, Kornfeld K (2013). Mated Progeny Production  
848 Is a Biomarker of Aging in *Caenorhabditis elegans*. *G3 (Bethesda)*. **3**, 2219-2232.
- 849 Qin Z, Hubbard EJ (2015). Non-autonomous DAF-16/FOXO activity antagonizes age-  
850 related loss of *C. elegans* germline stem/progenitor cells. *Nat Commun*. **6**, 7107.
- 851 Rinaldo C, Bazzicalupo P, Ederle S, Hilliard M, La Volpe A (2002). Roles for  
852 *Caenorhabditis elegans* rad-51 in meiosis and in resistance to ionizing radiation during  
853 development. *Genetics*. **160**, 471-479.
- 854 Rutkowski R, Dickinson R, Stewart G, Craig A, Schimpl M, Keyse SM, Gartner A  
855 (2011). Regulation of *Caenorhabditis elegans* p53/CEP-1-dependent germ cell  
856 apoptosis by Ras/MAPK signaling. *PLoS Genet*. **7**, e1002238.



- 857 Saito TT, Youds JL, Boulton SJ, Colaiacovo MP .(2009) Caenorhabditis elegans HIM-  
858 18/SLX-4 interacts with SLX-1 and XPF-1 and maintains genomic integrity in the  
859 germline by processing recombination intermediates. *PLoS Genet.* **5**, e1000735.
- 860 Schedl T (1997). Developmental Genetics of the Germ Line. In *C. elegans II.* (nd, DL  
861 Riddle, T Blumenthal, BJ Meyer , JR Priess, eds). Cold Spring Harbor (NY).
- 862 Schild-Prufert K, Saito TT, Smolikov S, Gu Y, Hincapie M, Hill DE, Vidal M, McDonald  
863 K, Colaiacovo MP (2011). Organization of the synaptonemal complex during meiosis  
864 in Caenorhabditis elegans. *Genetics.* **189**, 411-421.
- 865 Schumacher B, Hanazawa M, Lee MH, Nayak S, Volkmann K, Hofmann ER,  
866 Hengartner M, Schedl T, Gartner A (2005). Translational repression of C. elegans  
867 p53 by GLD-1 regulates DNA damage-induced apoptosis. *Cell.* **120**, 357-368.
- 868 Severson AF, Ling L, van Zuylen V, Meyer BJ (2009). The axial element protein HTP-  
869 3 promotes cohesin loading and meiotic axis assembly in C. elegans to implement the  
870 meiotic program of chromosome segregation. *Genes Dev.* **23**, 176.3-1778
- 871 Sijen T, Fleenor J, Simmer F, Thijssen KL, Parrish S, Timmons L, Plasterk RH, Fire  
872 A (2001). On the role of RNA amplification in dsRNA-triggered gene silencing. *Cell.*  
873 **107**, 465-476.
- 874 Slack C (2017). Ras signaling in aging and metabolic regulation .*Nutr Healthy Aging.*  
875 **4**, 195-205.
- 876 Subramanian VV, Bickel SE (2008). Aging predisposes oocytes to meiotic  
877 nondisjunction when the cohesin subunit SMC1 is reduced. *PLoS Genet.* **4**, e1000263.
- 878 Sulston JE, Horvitz HR (1977). Post-embryonic cell lineages of the nematode,  
879 Caenorhabditis elegans. *Dev Biol.* **56**, 110-156.
- 880 te Velde ER, Pearson PL (2002). The variability of female reproductive ageing. *Hum*  
881 *Reprod Update.* **8**, 141-154.
- 882 Templeman NM, Murphy CT (2018). Regulation of reproduction and longevity by  
883 nutrient-sensing pathways. *J Cell Biol.* **217**, 93-106.

- 884 Tsutsumi M, Fujiwara R, Nishizawa H, Ito M, Kogo H, Inagaki H, Ohye T, Kato T, Fujii  
885 T, Kurahashi H (2014). Age-related decrease of meiotic cohesins in human oocytes.  
886 *PLoS One*. **9**, e96710.
- 887 Wang MC, Oakley HD, Carr CE, Sowa JN, Ruvkun G (2014). Gene pathways that  
888 delay *Caenorhabditis elegans* reproductive senescence. *PLoS Genet*. **10**, e1004752.
- 889 Webster A, Schuh M (2017). Mechanisms of Aneuploidy in Human Eggs. *Trends Cell*  
890 *Biol*. **27**, 55-68.
- 891 Wilkinson DS, Taylor RC, Dillin A (2012). Analysis of aging in *Caenorhabditis elegans*.  
892 *Methods Cell Biol*. **107**, 353-381.
- 893 Ye AL, Bhalla N (2011). Reproductive aging: insights from model organisms. *Biochem*  
894 *Soc Trans*. **39**, 1770-1774.
- 895 Yin Y, Donlevy S, Smolikove S (2016). Coordination of Recombination with Meiotic  
896 Progression in the *Caenorhabditis elegans* Germline by KIN-18, a TAO Kinase That  
897 Regulates the Timing of MPK-1 Signaling. *Genetics*. **202**, 45-59.
- 898 Yokoo R, Zawadzki KA, Nabeshima K, Drake M, Arur S, Villeneuve AM (2012).  
899 COSA-1 reveals robust homeostasis and separable licensing and reinforcement steps  
900 governing meiotic crossovers. *Cell*. **149**, 75-87.
- 901 Yu Z, Kim Y, Dernburg AF (2016). Meiotic recombination and the crossover assurance  
902 checkpoint in *Caenorhabditis elegans*. *Semin Cell Dev Biol*. **54**, 106-116.
- 903 Zetka M (2009). Homologue pairing, recombination and segregation in *Caenorhabditis*  
904 *elegans*. *Genome Dyn*. **5**, 43-55.
- 905 Zhou Z, Hartweg E, Horvitz HR (2001). CED-1 is a transmembrane receptor that  
906 mediates cell corpse engulfment in *C. elegans*. *Cell*. **104**, 43-56.
- 907 Zielinska AP, Bellou E, Sharma N, Frombach AS, Seres KB, Gruhn JR, Blayney M,  
908 Eckel H, Moltrecht R, Elder K, Hoffmann ER, Schuh M (2019). Meiotic Kinetochores  
909 Fragment into Multiple Lobes upon Cohesin Loss in Aging Eggs. *Curr Biol*. **29**, 3749-  
910 3765 e3747.

911

912 **Acknowledgments**

913 We thank the Caenorhabditis Genetics Center for kindly providing strains. We thank  
914 Sarit Smolikove for the SYP-2 antibody. This work was supported by Israel Science  
915 Foundation (grant numbers 1283/15, 2090/15) to Y.B.T. and the Faculty Fellowship of  
916 the Azrieli Fellows Program to T.B.

917

918 **Availability of data and materials**

919 Strains and plasmids are available upon request.

920

921 **Conflict of Interest**

922 The Authors declare that they have no conflict of interest

923

924 **Authors' contributions**

925 RF and HA performed experiments and analyzed data. TB and NL devised and  
926 performed computational and biophysical analysis. HA and YBT designed  
927 experiments and wrote the manuscript.

928

929 **Supplementary Figures**

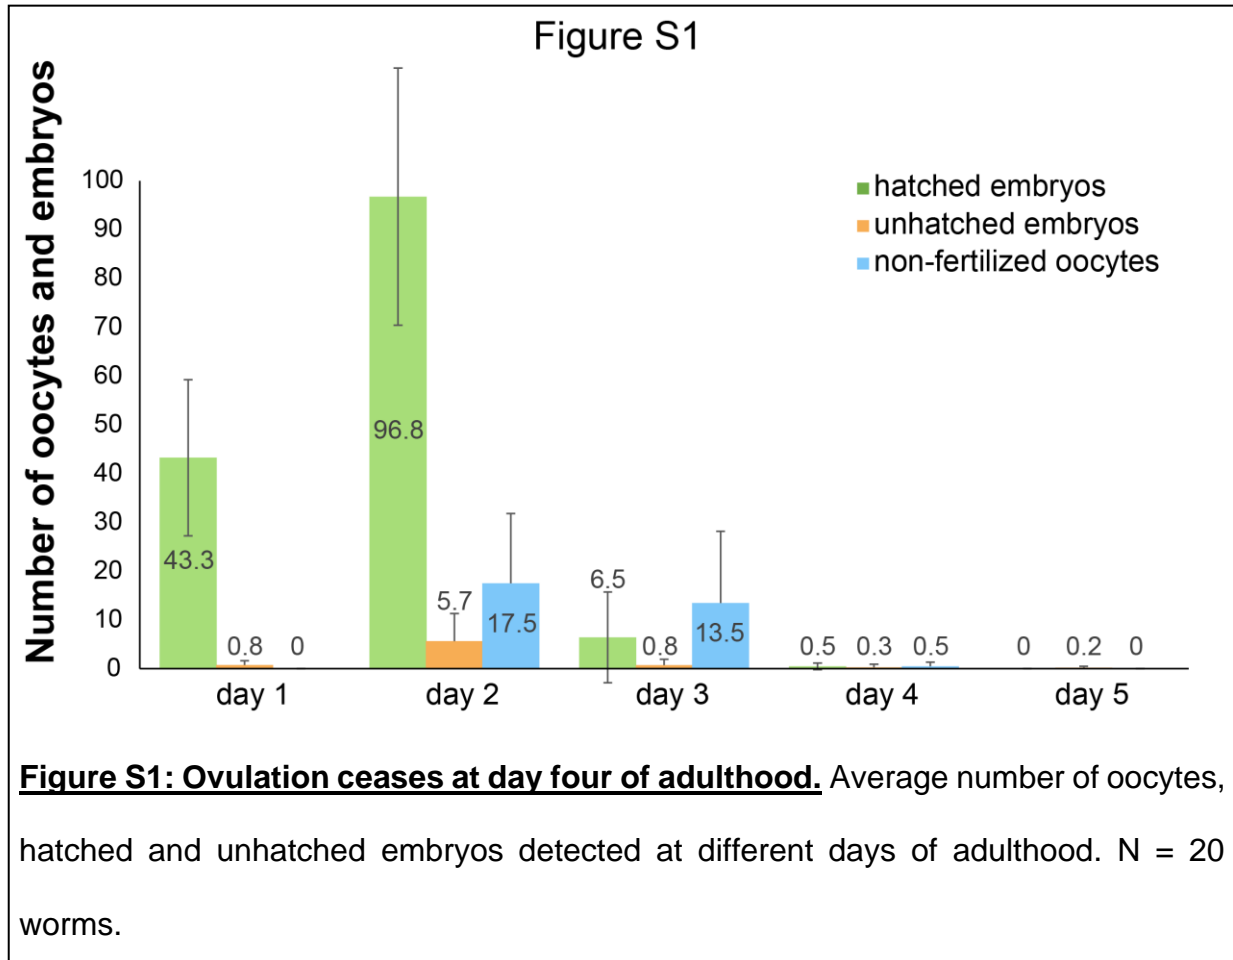

930

931

932

933

934

935

936

937

938

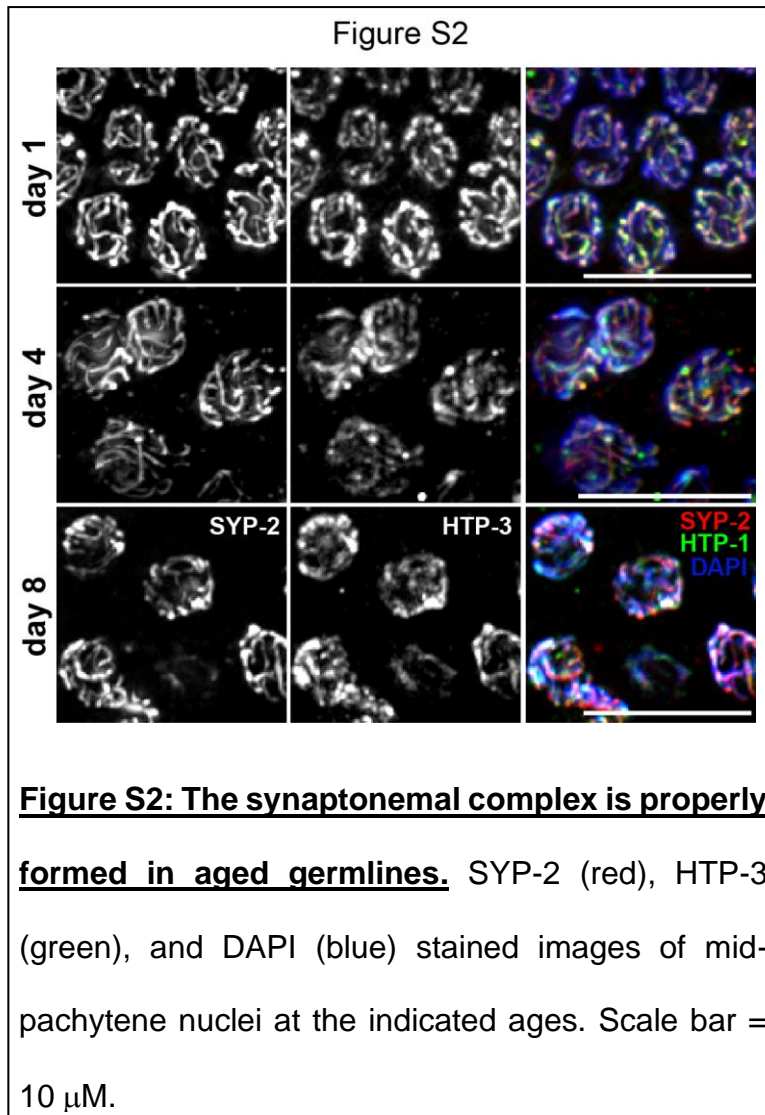

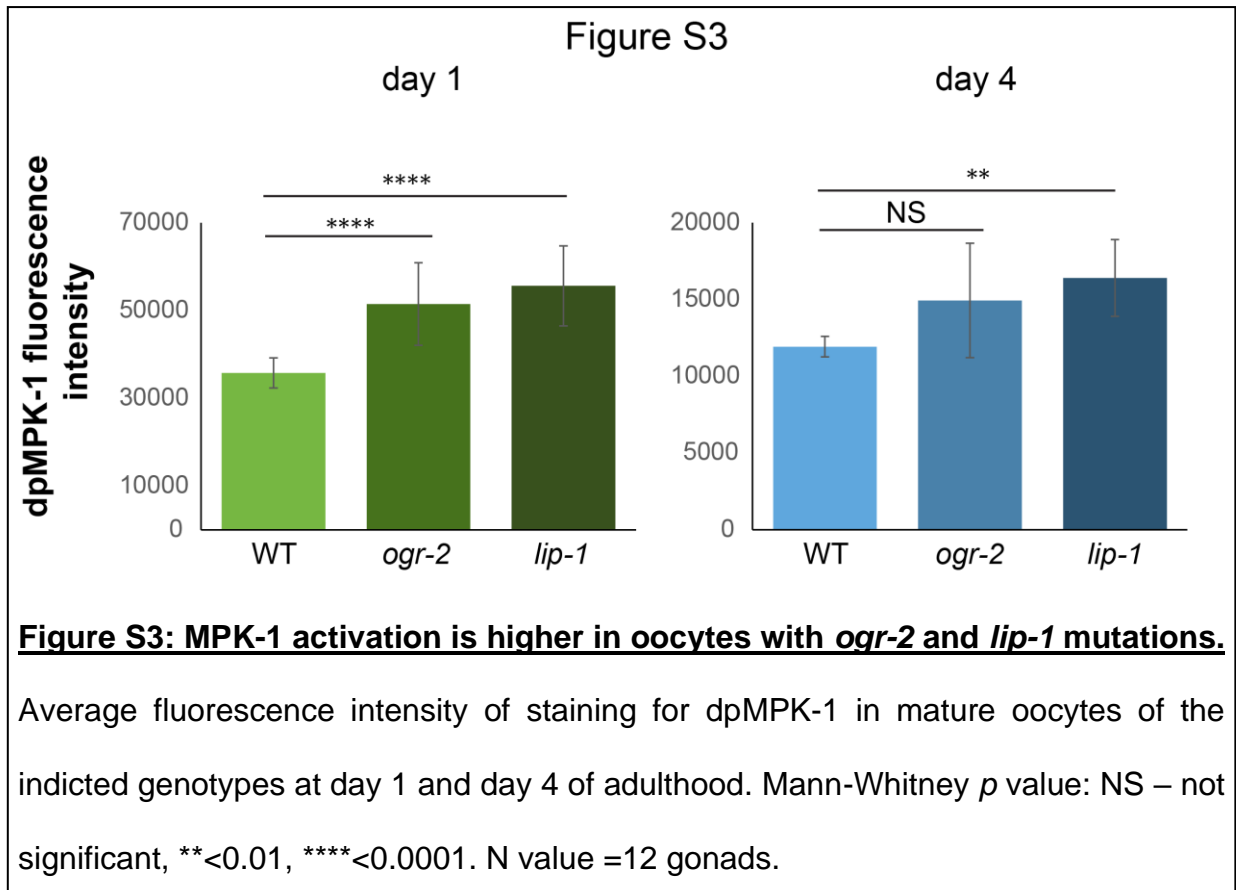

942
